# Supplementary material for: Criterion-Related Validity of Field-Based Fitness Tests in Adults: A Systematic Review
Source: MDPI journal article supplement (doi:10.3390/jcm10163743), 2021-08-23
Supplement: s1 [file s1]

**Supplementary table S1.** Quality assessment criteria for criterion-related validity studies.

| Grading system parameter                                                                                                                                                             | Grade | Criterion                                                                     |
|--------------------------------------------------------------------------------------------------------------------------------------------------------------------------------------|-------|-------------------------------------------------------------------------------|
| Number of study subjects                                                                                                                                                             | 0     | $n \leq 10$                                                                   |
|                                                                                                                                                                                      | 1     | $n = 11-50$                                                                   |
|                                                                                                                                                                                      | 2     | $n \geq 51$                                                                   |
| Description of the study population<br>with respect to age, sex, health status,<br>fitness levels, pubertal status, ethnicity,<br>physical activity patterns, body composition, etc. | 0     | Less items than required for grade 1                                          |
|                                                                                                                                                                                      | 1     | At least age, sex, health status, and fitness levels                          |
|                                                                                                                                                                                      | 2     | More items than required for grade 1                                          |
| Statistical analysis included in the study                                                                                                                                           | 0     | Those not included in 1                                                       |
|                                                                                                                                                                                      | 1     | Error indexes or regression analysis                                          |
|                                                                                                                                                                                      | 2     | $\geq 3$ items or Bland-Altman plot and/or ANOVA<br>for repeated measurements |
| Rating for total score:                                                                                                                                                              |       |                                                                               |
| High quality = 5-6                                                                                                                                                                   |       |                                                                               |
| Low quality = 3-4                                                                                                                                                                    |       |                                                                               |
| Very low quality = 0-2                                                                                                                                                               |       |                                                                               |

**Supplementary table S2.** Quality assessment of the included meta-analysis/systematic reviews using the Assessment of Multiple Systematic Reviews (AMSTAR) rating tool.

| Reviews                      | 1   | 2   | 3   | 4   | 5  | 6   | 7   | 8   | 9   | 10  | 11  | Rating | Quality* |
|------------------------------|-----|-----|-----|-----|----|-----|-----|-----|-----|-----|-----|--------|----------|
| Mayorga-Vega et al. 2014 [1] | Yes | No  | Yes | Yes | No | Yes | No  | No  | Yes | Yes | Yes | 7      | Medium   |
| Mayorga-Vega et al. 2014 [2] | Yes | No  | Yes | Yes | No | Yes | No  | No  | Yes | Yes | Yes | 7      | Medium   |
| Bennet et al. 2016 [3]       | Yes | Yes | Yes | Yes | No | Yes | Yes | Yes | N/A | N/A | Yes | 8      | High     |
| Mayorga-Vega et al. 2015 [4] | Yes | Yes | Yes | Yes | No | Yes | No  | No  | Yes | Yes | Yes | 8      | High     |
| Mayorga-Vega et al. 2016 [5] | Yes | Yes | Yes | Yes | No | Yes | No  | No  | Yes | Yes | Yes | 8      | High     |

AMSTAR contains 11-items to appraise the methodological aspects of the systematic reviews. All 11-items were scored as “Yes”, “No”, “Can’t Answer” (C/A) or “Not Applicable” (N/A). A total possible score of 11 was calculated, counting only for positive responses ("Yes").

\*The final quality rates were computed by tertiles, where the first tertile ranged from 0 to 3 points, the second tertile from 4 to 7 points and the third tertile from 8 to 11 points. Likewise, each tertile were treated as “low”, “medium” or “high”, quality, respectively.

## REFERENCES

- Mayorga-Vega D, Merino-Marban R, Viciano J Criterion-related validity of sit-and-reach tests for estimating hamstring and lumbar extensibility: a meta-analysis. *J Sports Sci Med* 2014;13:1-14.
- Mayorga-Vega D, Viciano J, Cocca A *et al.* Criterion-related validity of toe-touch test for estimating hamstring extensibility: A metaanalysis. *J Hum Sport Exerc* 2014;9:188-200.
- Bennett H, Parfitt G, Davison K *et al.* Validity of submaximal step tests to estimate maximal oxygen uptake in healthy adults. *Sports Med* 2016;46:737-750.
- Mayorga-Vega D, Aguilar-Soto P, Viciano J Criterion-related validity of the 20-m shuttle run test for estimating cardiorespiratory fitness: a meta-analysis. *J Sports Sci Med* 2015;14:536-547.
- Mayorga-Vega D, Bocanegra-Parrilla R, Ornelas M *et al.* Criterion-related validity of the distance- and time-based walk/run field tests for estimating cardiorespiratory fitness: a systematic review and Meta-analysis. *PLoS One* 2016;11:e0151671-e0151671.

**Supplementary table S3.** Quality assessment of fitness criterion-related validity studies.

NA indicates not applicable because the criterion-related validity of the study is carried out on the dynamometer, not in subjects.

| Study                            | Fitness Component         | Number of study subjects | Description of the study population | Statistical analysis | Total score |
|----------------------------------|---------------------------|--------------------------|-------------------------------------|----------------------|-------------|
| Leger & Boucher 1980 [6]         | Cardiorespiratory fitness | 1                        | 0                                   | 1                    | 2           |
| Santa María et al. 1976 [7]      | Cardiorespiratory fitness | 1                        | 2                                   | 0                    | 3           |
| Siconolfi et al. 1985 [8]        | Cardiorespiratory fitness | 1                        | 1                                   | 1                    | 3           |
| Ritchie et al. 2005 [9]          | Cardiorespiratory fitness | 1                        | 2                                   | 0                    | 3           |
| Azmi & Sulaiman, 2017 [10]       | Cardiorespiratory fitness | 1                        | 2                                   | 0                    | 3           |
| McGawley 2017 [11]               | Cardiorespiratory fitness | 0                        | 1                                   | 2                    | 3           |
| Giacomantonio et al. 2020 [12]   | Cardiorespiratory fitness | 1                        | 2                                   | 0                    | 3           |
| Leger et al. 1988 [13]           | Cardiorespiratory fitness | 2                        | 1                                   | 1                    | 4           |
| Flouris et al. 2010 [14]         | Cardiorespiratory fitness | 1                        | 2                                   | 1                    | 4           |
| Gabriel et al. 2010 [15]         | Cardiorespiratory fitness | 2                        | 2                                   | 0                    | 4           |
| Hansen et al. 2011 [16]          | Cardiorespiratory fitness | 2                        | 2                                   | 0                    | 4           |
| Burr et al. 2011 [17]            | Cardiorespiratory fitness | 1                        | 2                                   | 1                    | 4           |
| Mikawa & Senjyu et al. 2011 [18] | Cardiorespiratory fitness | 2                        | 2                                   | 0                    | 4           |
| Arcuri et al. 2015 [19]          | Cardiorespiratory fitness | 2                        | 2                                   | 0                    | 4           |
| Jurgensen et al. 2015 [20]       | Cardiorespiratory fitness | 2                        | 2                                   | 0                    | 4           |
| Lerche et al. 2017 [21]          | Cardiorespiratory fitness | 2                        | 2                                   | 0                    | 4           |
| Siconolfi et al. 1982 [22]       | Cardiorespiratory fitness | 2                        | 2                                   | 1                    | 5           |
| Kline et al. 1987 [23]           | Cardiorespiratory fitness | 2                        | 2                                   | 1                    | 5           |
| Oja et al. 1991 [24]             | Cardiorespiratory fitness | 2                        | 2                                   | 1                    | 5           |
| Laukkanen et al. 1992 [25]       | Cardiorespiratory fitness | 2                        | 2                                   | 1                    | 5           |
| Weller et al. 1992 [26]          | Cardiorespiratory fitness | 2                        | 2                                   | 1                    | 5           |

|                             |                           |   |   |   |   |
|-----------------------------|---------------------------|---|---|---|---|
| Laukkanen et al. 1993 [27]  | Cardiorespiratory fitness | 2 | 2 | 1 | 5 |
| George et al. 1993 [28]     | Cardiorespiratory fitness | 2 | 2 | 1 | 5 |
| George et al. 1998 [29]     | Cardiorespiratory fitness | 2 | 2 | 1 | 5 |
| McNaughton et al. 1998 [30] | Cardiorespiratory fitness | 1 | 2 | 2 | 5 |
| Greenhalgh et al. 2001 [31] | Cardiorespiratory fitness | 1 | 2 | 2 | 5 |
| Larsen et al. 2002 [32]     | Cardiorespiratory fitness | 2 | 2 | 1 | 5 |
| Flouris et al. 2004 [33]    | Cardiorespiratory fitness | 1 | 2 | 2 | 5 |
| Cooper et al. 2005 [34]     | Cardiorespiratory fitness | 1 | 2 | 2 | 5 |
| Kumar et al. 2012 [35]      | Cardiorespiratory fitness | 1 | 2 | 2 | 5 |
| Seneli et al. 2013 [36]     | Cardiorespiratory fitness | 1 | 2 | 2 | 5 |
| Carvalho et al. 2015 [37]   | Cardiorespiratory fitness | 1 | 2 | 1 | 5 |
| Teren et al. 2016 [38]      | Cardiorespiratory fitness | 2 | 2 | 1 | 5 |
| Guo et al. 2018 [39]        | Cardiorespiratory fitness | 1 | 2 | 2 | 5 |
| Manttari et al. 2018 [40]   | Cardiorespiratory fitness | 2 | 2 | 1 | 5 |
| Ricci et al. 2019 [41]      | Cardiorespiratory fitness | 1 | 2 | 2 | 5 |
| Bonet et al. 2020 [42]      | Cardiorespiratory fitness | 1 | 2 | 2 | 5 |
| Kieu et al. 2020 [43]       | Cardiorespiratory fitness | 1 | 2 | 2 | 5 |
| Dolgener et al. 1994 [44]   | Cardiorespiratory fitness | 2 | 2 | 2 | 6 |
| Laukkanen et al. 2000 [45]  | Cardiorespiratory fitness | 2 | 2 | 2 | 6 |
| Flouris et al. 2005 [46]    | Cardiorespiratory fitness | 2 | 2 | 2 | 6 |
| Metsios et al. 2008 [47]    | Cardiorespiratory fitness | 2 | 2 | 2 | 6 |
| Kim et al. 2011 [48]        | Cardiorespiratory fitness | 2 | 2 | 2 | 6 |
| Aadahl et al. 2012 [49]     | Cardiorespiratory fitness | 2 | 2 | 2 | 6 |
| Cao et al. 2013 [50]        | Cardiorespiratory fitness | 2 | 2 | 2 | 6 |

|                                       |                           |   |   |   |   |
|---------------------------------------|---------------------------|---|---|---|---|
| Lunt et al. 2013 [51]                 | Cardiorespiratory fitness | 2 | 2 | 2 | 6 |
| Beutner et al. 2015 [52]              | Cardiorespiratory fitness | 2 | 2 | 2 | 6 |
| Di Thommazo-Luporini et al. 2015 [53] | Cardiorespiratory fitness | 2 | 2 | 2 | 6 |
| Di Thommazo-Luporini et al. 2016 [54] | Cardiorespiratory fitness | 2 | 2 | 2 | 6 |
| Hansen et al. 2016 [55]               | Cardiorespiratory fitness | 2 | 2 | 2 | 6 |
| Jamnick et al. 2016 [56]              | Cardiorespiratory fitness | 2 | 2 | 2 | 6 |
| Jurio-Iriarte et al. 2017 [57]        | Cardiorespiratory fitness | 2 | 2 | 2 | 6 |
| Jurio-Iriarte et al. 2018 [58]        | Cardiorespiratory fitness | 2 | 2 | 2 | 6 |
| Hong et al. 2019 [59]                 | Cardiorespiratory fitness | 2 | 2 | 2 | 6 |
| Lee et al. 2019 [60]                  | Cardiorespiratory fitness | 2 | 2 | 2 | 6 |
| Lima et al. 2019 [61]                 | Cardiorespiratory fitness | 2 | 2 | 2 | 6 |
| Berger 1966 [62]                      | Musculoskeletal fitness   | 1 | 0 | 0 | 1 |
| Wells & Dillon 1952 [63]              | Musculoskeletal fitness   | 2 | 0 | 0 | 2 |
| DeWitt 1944 [64]                      | Musculoskeletal fitness   | 2 | 0 | 0 | 2 |
| Mathews 1957 [65]                     | Musculoskeletal fitness   | 2 | 0 | 0 | 2 |
| Harvey & Scott 1967 [66]              | Musculoskeletal fitness   | 2 | 0 | 0 | 2 |
| Knudson & Johnston 1995 [67]          | Musculoskeletal fitness   | 1 | 1 | 0 | 2 |
| Clemons et al. 2004 [68]              | Musculoskeletal fitness   | 2 | 0 | 0 | 2 |
| Wood & Baumgartner 2004 [69]          | Musculoskeletal fitness   | 2 | 0 | 0 | 2 |
| Clemons et al. 2010 [70]              | Musculoskeletal fitness   | 1 | 1 | 0 | 2 |
| Clemons et al. 2014 [71]              | Musculoskeletal fitness   | 1 | 0 | 1 | 2 |
| Cotten 1972 [72]                      | Musculoskeletal fitness   | 2 | 1 | 0 | 3 |
| Jackson & Langford 1989 [73]          | Musculoskeletal fitness   | 2 | 0 | 1 | 3 |

|                                |                         |    |    |   |            |
|--------------------------------|-------------------------|----|----|---|------------|
| Kipper & Parker 1987 [74]      | Musculoskeletal fitness | 1  | 2  | 0 | 3          |
| Liemohn et al. 1994 [75]       | Musculoskeletal fitness | 1  | 1  | 1 | 3          |
| Diener et al. 1995 [76]        | Musculoskeletal fitness | 1  | 2  | 0 | 3          |
| Mannion et al. 1997 [77]       | Musculoskeletal fitness | 1  | 0  | 2 | 3          |
| Mathiowetz 2002 [78]           | Musculoskeletal fitness | 2  | 1  | 0 | 3          |
| Baumgartner & Gaunt 2005 [79]  | Musculoskeletal fitness | 2  | 1  | 0 | 3          |
| Ritchie et al. 2005 [9]        | Musculoskeletal fitness | 1  | 2  | 0 | 3          |
| López-Miñarro et al. 2015 [80] | Musculoskeletal fitness | 2  | 0  | 1 | 3          |
| Silva et al. 2015 [81]         | Musculoskeletal fitness | 1  | 2  | 0 | 3          |
| Broer & Galles 1958 [82]       | Musculoskeletal fitness | 2  | 2  | 0 | 4          |
| Hall et al. 1992 [83]          | Musculoskeletal fitness | 2  | 2  | 0 | 4          |
| Harkonen 1993 [84]             | Musculoskeletal fitness | NA | NA | 1 | <b>Low</b> |
| Sparto et al. 1997 [85]        | Musculoskeletal fitness | 0  | 2  | 2 | 4          |
| Knudson et al. 2001 [86]       | Musculoskeletal fitness | 1  | 2  | 1 | 4          |
| Youdas et al. 2008 [87]        | Musculoskeletal fitness | 2  | 2  | 0 | 4          |
| Bohannon et al. 2010 [88]      | Musculoskeletal fitness | 2  | 1  | 1 | 4          |
| Ayala et al. 2012 [89]         | Musculoskeletal fitness | 1  | 2  | 1 | 4          |
| Mier et al. 2013 [90]          | Musculoskeletal fitness | 2  | 2  | 0 | 4          |
| Taylor et al. 2013 [91]        | Musculoskeletal fitness | 1  | 2  | 1 | 4          |
| Ten Hoor et al. 2016 [92]      | Musculoskeletal fitness | 1  | 2  | 1 | 4          |
| Clemons et al. 2018 [93]       | Musculoskeletal fitness | 1  | 2  | 1 | 4          |

|                                         |                         |    |    |   |             |
|-----------------------------------------|-------------------------|----|----|---|-------------|
| Applegate et al. 2019 [94]              | Musculoskeletal fitness | 1  | 2  | 1 | 4           |
| Mannion et al. 1994 [95]                | Musculoskeletal fitness | 2  | 2  | 1 | 5           |
| Kankaanpää et al. 1998 [96]             | Musculoskeletal fitness | 2  | 2  | 1 | 5           |
| Shechtman et al. 2005 [97]              | Musculoskeletal fitness | 2  | 2  | 1 | 5           |
| Coorevits et al. 2008 [98]              | Musculoskeletal fitness | 1  | 2  | 2 | 5           |
| Bui et al. 2015 [99]                    | Musculoskeletal fitness | 1  | 2  | 2 | 5           |
| De Blaiser et al. 2018 [100]            | Musculoskeletal fitness | 1  | 2  | 2 | 5           |
| Kawano et al. 2010 [101]                | Musculoskeletal fitness | 2  | 2  | 2 | 6           |
| España-Romero et al. 2010 [102]         | Musculoskeletal fitness | NA | NA | 2 | <b>High</b> |
| Cadenas-Sánchez et al. 2016 [103]       | Musculoskeletal fitness | NA | NA | 2 | <b>High</b> |
| Kolimechkov et al. 2020 [104]           | Musculoskeletal fitness | NA | NA | 2 | <b>High</b> |
| Ritchie et al. 2005[9]                  | Motor fitness           | 1  | 2  | 0 | 3           |
| Miyamoto et al. 2008 <sup>a</sup> [105] | Motor fitness           | 2  | 1  | 1 | 4           |
| Miyamoto et al. 2008b [106]             | Motor fitness           | 2  | 2  | 0 | 4           |

---

Total score indicates high quality = 5-6; low quality = 3-4; very low quality = 0-2.



## REFERENCES

- Leger L, Boucher R An indirect continuous running multistage field test: the Universite de Montreal track test. *Can J Appl Sport Sci* 1980;5:77-84.
- Santa Maria D, Kinnear GR, Kearney JT *et al.* The objectivity, reliability, and validity of the OSU step test for college males. *Res Q* 1976;47:445-452.
- Siconolfi SF, Garber CE, Lasater TM *et al.* A simple, valid step test for estimating maximal oxygen uptake in epidemiologic studies. *Am J Epidemiol* 1985;121:382-390.
- Ritchie C, Trost SG, Brown W *et al.* Reliability and validity of physical fitness field tests for adults aged 55 to 70 years. *J Sci Med Sport* 2005;8:61-70.
- Azmi SH, Sulaiman N Validity of selected cardiovascular field-based test among Malaysian healthy female adult. *J Fundam Appl Sci* 2017;9:1227-1235.
- McGawley K The Reliability and Validity of a Four-Minute Running Time-Trial in Assessing VO2max and Performance. *Front Physiol* 2017;8:270.
- Giacomantonio N, Morrison P, Rasmussen R *et al.* Reliability and validity of the 6-minutestep test for clinical assessment of cardiorespiratory fitness in people at risk of cardiovascular disease. *J Strength Cond Res* 2020;34:1376-1382.
- Leger LA, Mercier D, Gadoury C *et al.* The multistage 20 metre shuttle run test for aerobic fitness. *J Sports Sci* 1988;6:93-101.
- Flouris AD, Metsios GS, Famisis K *et al.* Prediction of VO2max from a new field test based on portable indirect calorimetry. *J Sci Med Spor* 2010;13:70-73.
- Gabriel KKP, Rankin RL, Lee C *et al.* Test-retest reliability and validity of the 400-meter walk test in healthy, middle-aged women. *J Phys Act Health* 2010;7:649-657.
- Hansen D, Jacobs N, Bex S *et al.* Are fixed-rate step tests medically safe for assessing physical fitness? *Eur J Appl Physiol* 2011;111:2593-2599.
- Burr JF, Bredin SS, Faktor MD *et al.* The 6-minute walk test as a predictor of objectively measured aerobic fitness in healthy working-aged adults. *Phys Sportsmed* 2011;39:133-139.
- Mikawa K, Senjyu H Development of a field test for evaluating aerobic fitness in middle-aged adults: Validity of a 15-m Incremental Shuttle Walk and Run Test. *J Sports Sci Med* 2011;10:712-717.
- Arcuri JF, Borghi-Silva A, Labadessa IG *et al.* Validity and reliability of the 6-minute step test in healthy individuals: a cross-sectional study. *Clin J Sport Med* 2016;26:69-75.

- Jurgensen SP, Trimer R, Dourado VZ *et al.* Shuttle walking test in obese women: test-retest reliability and concurrent validity with peak oxygen uptake. *Clin Physiol Funct Imaging* 2015;35:120-126.
- Lerche L, Olsen A, Petersen KEN *et al.* Validity of physical activity and cardiorespiratory fitness in the Danish cohort "Diet, Cancer and Health-Next Generations". *Scand J Med Sci Sports* 2017;27:1864-1872.
- Siconolfi SF, Cullinane EM, Carleton RA *et al.* Assessing VO<sub>2</sub>max in epidemiologic studies: modification of the Astrand-Rhyming test. *Med Sci Sports Exerc* 1982;14:335-338.
- Kline C, Porcari JP, Hintermeister R *et al.* Estimation of from a one-mile track walk, gender, age and body weight. *Med Sports Exerc* 1987;19:253-259.
- Oja P, Laukkanen R, Pasanen M *et al.* A 2-km walking test for assessing the cardiorespiratory fitness of healthy adults. *Int J Sports Med* 1991;12:356-362.
- Laukkanen R, Oja P, Pasanen M *et al.* Validity of a two kilometre walking test for estimating maximal aerobic power in overweight adults. *Int J Obes Relat Metab Disord* 1992;16:263-268.
- Weller IM, Thomas SG, Cox MH *et al.* A study to validate the Canadian Aerobic Fitness Test. *Can J Public Health* 1992;83:120-124.
- Laukkanen RMT, Oja P, Pasanen ME *et al.* Criterion validity of a two-kilometer walking test for predicting the maximal oxygen uptake of moderately to highly active middle-aged adults. *Scand J Med Sci Sports* 1993: 267-272.
- George JD, Vehrs PR, Allsen PE *et al.* Development of a submaximal treadmill jogging test for fit college-aged individuals. *Med Sci Sports Exerc* 1993;25:643-647.
- George JD, Fellingham GW, Fisher AG A modified version of the Rockport Fitness Walking Test for college men and women. *Res Q Exerc Sport* 1998;69:205-209.
- McNaughton L, Hall P, Cooley D Validation of several methods of estimating maximal oxygen uptake in young men. *Percept Mot Skills* 1998;87:575-584.
- Greenhalgh HA, George JD, Hager RL Cross-validation of a quarter-mile walk test using two VO<sub>2</sub> max regression models. *Meas Phys Educ Exerc Sci* 2001;5:139-151.
- Larsen GE, George JD, Alexander JL *et al.* Prediction of maximum oxygen consumption from walking, jogging, or running. *Res Q Exerc Sport* 2002;73:66-72.
- Flouris AD, Koutedakis Y, Nevill A *et al.* Enhancing specificity in proxy-design for the assessment of bioenergetics. *J Sci Med Sport* 2004;7:197-204.
- Cooper SM, Baker JS, Tong RJ *et al.* The repeatability and criterion related validity of the 20 m multistage fitness test as a predictor of maximal oxygen uptake in active young men. *Br J Sports Med* 2005;39:e19.

- Kumar SK, Khare P, Jaryal AK *et al.* Validity of heart rate based nomogram for estimation of maximum oxygen uptake in Indian population. *Indian J Physiol Pharmacol* 2012;56:279-283.
- Seneli RM, Ebersole KT, O'Connor KM *et al.* Estimated VO<sub>2</sub>max from the Rockport Walk Test on a Nonmotorized Curved Treadmill. *J Strength Cond Res* 2013;27:3495-3505.
- Carvalho LP, Di Thommazo-Luporini L, Aubertin-Leheudre M *et al.* Prediction of cardiorespiratory fitness by the six-minute step test and its association with muscle strength and power in sedentary obese and lean young women: a cross-sectional study. *PLoS One* 2015;10:e0145960.
- Teren A, Zachariae S, Beutner F *et al.* Incremental value of veterans specific activity questionnaire and the ymca-step test for the assessment of cardiorespiratory fitness in population-based studies. *Eur J Prev Cardiol* 2016;23:1221-1227.
- Guo Y, Bian J, Li Q *et al.* A 3-minute test of cardiorespiratory fitness for use in primary care clinics. *PLoS One* 2018;13:e0201598.
- Manttari A, Suni J, Sievanen H *et al.* Six-minute walk test: a tool for predicting maximal aerobic power (VO<sub>2</sub> max) in healthy adults. *Clin Physiol Funct Imaging* 2018.
- Ricci PA, Cabiddu R, Jürgensen SP *et al.* Validation of the two-minute step test in obese with comorbidities and morbidly obese patients. *Braz J Med Biol Res* 2019;52:e8402.
- Bonet JB, Magalhaes J, Viscor G *et al.* A field tool for the aerobic power evaluation of middle-aged female recreational runners. *Women Health* 2020.
- Kieu NTV, Jung SJ, Shin SW *et al.* The validity of the YMCA 3-minute step test for estimating maximal oxygen uptake in healthy Korean and Vietnamese adults. *J Lifestyle Med* 2020;10:21-29.
- Dolgener FA, Hensley LD, Marsh JJ *et al.* Validation of the Rockport Fitness Walking Test in college males and females. *Res Q Exerc Sport* 1994;65:152-158.
- Laukkanen RMT, Kukkonen-Harjula TK, Oja P *et al.* Prediction of change in maximal aerobic power by the 2-km walk test after walking training in middle-aged adults. *Int J Sports Med* 2000;21:113-116.
- Flouris AD, Metsios GS, Koutedakis Y Enhancing the efficacy of the 20 m multistage shuttle run test. *Br J Sports Med* 2005;39:166-170.
- Metsios GS, Flouris AD, Koutedakis Y *et al.* Criterion-related validity and test-retest reliability of the 20m square shuttle test. *J Sci Med Sport* 2008;11:214-217.
- Kim J, Jung SH, Cho HC Validity and Reliability of Shuttle-Run Test in Korean Adults. *Int J Sports Med* 2011;32:580-585.
- Aadahl M, Zacho M, Linneberg A *et al.* Comparison of the Danish step test and the watt-max test for estimation of maximal oxygen uptake: the Health2008 study. *Eur J Prev Cardiol* 2013;20:1088-1094.

- Cao Z-B, Miyatake N, Aoyama T *et al.* Prediction of maximal oxygen uptake from a 3-minute walk based on gender, age, and body composition. *J Phys Act Health* 2013;10:280-287.
- Lunt H, Roiz De Sa D, Roiz De Sa J *et al.* Validation of one-mile walk equations for the estimation of aerobic fitness in British military personnel under the age of 40 years. *Mil Med* 2013;178:753-759.
- Beutner F, Ubrich R, Zachariae S *et al.* Validation of a brief step-test protocol for estimation of peak oxygen uptake. *Eur J Prev Cardiol* 2015;22:503-512.
- Di Thommazo-Luporini L, Pinheiro Carvalho L, Luporini R *et al.* The six-minute step test as a predictor of cardiorespiratory fitness in obese women. *Eur J Phys Rehabil Med* 2015;51:793-802.
- Di Thommazo-Luporini L, Carvalho LP, Luporini RL *et al.* Are cardiovascular and metabolic responses to field walking tests interchangeable and obesity-dependent? *Disabil Rehabil* 2016;38:1820-1829.
- Hansen D, Jacobs N, Thijs H *et al.* Validation of a single-stage fixed-rate step test for the prediction of maximal oxygen uptake in healthy adults. *Clin Physiol Funct Imaging* 2016;36:401-406.
- Jamnick NA, By S, Pettitt CD *et al.* Comparison of the YMCA and a custom submaximal exercise test for determining Vo2max. *Med Sci Sports Exerc* 2016;48:254-259.
- Jurio-Iriarte B, Gorostegi-Anduaga I, Rodrigo Aispuru G *et al.* Association between Modified Shuttle Walk Test and cardiorespiratory fitness in overweight/obese adults with primary hypertension: EXERDIET-HTA study. *J Am Soc Hypertens* 2017;11:186-195.
- Jurio-Iriarte B, Brubaker PH, Gorostegi-Anduaga I *et al.* Validity of the modified shuttle walk test to assess cardiorespiratory fitness after exercise intervention in overweight/obese adults with primary hypertension. *Clin Exp Hypertens* 2018:1-6.
- Hong SH, Yang HI, Kim DI *et al.* Validation of submaximal step tests and the 6-min walk test for predicting maximal oxygen consumption in young and healthy participants. *Int J Environ Res Public Health* 2019;16.
- Lee O, Lee S, Kang M *et al.* Prediction of maximal oxygen consumption using the Young Men's Christian Association-step test in Korean adults. *Eur J Appl Physiol* 2019;119:1245-1252.
- Lima LP, Leite HR, Matos MA *et al.* Cardiorespiratory fitness assessment and prediction of peak oxygen consumption by Incremental Shuttle Walking Test in healthy women. *PLoS One* 2019;14:e0211327.
- Berger R Evaluation of the 2-minute sit-up test as a measure of muscular endurance and strength. *J Assoc Phys Ment Rehabil* 1966;20:140.
- Wells KF, Dillon EK The sit-and-reach. A test of back and leg flexibility. *Res Q Exerc Sport* 1952;23:115-118.
- DeWitt R A study of the sit-up Type of test as a means of measuring strength and endurance of the abdominal muscles. *Res Q* 1944;15:60-63.
- Mathews DK, Shaw V, Bohnen M Hip flexibility of college women as related to length of body segments. *Res Q* 1957;28:352-356.
- Harvey VP, Scott GD An investigation of the curl-down test as a measure of abdominal strength. *Res Q* 1967;38:22-27.
- Knudson D, Johnston D Validity and reliability of a bench trunk-curl test of abdominal endurance. *J Strength Cond Res* 1995;9:165-169.

Clemons JM, Duncan CA, Blanchard OE *et al.* Relationships between the flexed-arm hang and select measures of muscular fitness. *J Strength Cond Res* 2004;18:630-636.

Wood HM, Baumgartner TA Objectivity, reliability, and validity of the bent-knee push-up for college-age women. *Meas Phys Educ Exerc Sci* 2004;8:203-212.

Clemons JM, Campbell B, Jeansonne C Validity and reliability of a new test of upper body power. *J Strength Cond Res* 2010;24:1559-1565.

Clemons JM Construct validity of a modification of the flexed arm hang test. *J Strength Cond Res* 2014;28:3523-3530.

Cotten DJ A comparison of selected trunk flexibility tests. *Am Correct Ther J* 1972;26:24-26.

Jackson A, Langford NJ The criterion-related validity of the sit and reach test: replication and extension of previous findings. *Res Q Exerc Sport* 1989;60:384-387.

Kippers V, Parker AW Toe-touch test: A measure of its validity. *Phys Ther* 1987;67:1680-1684.

Liemohn W, Sharpe GL, Wasserman JF Criterion related validity of the sit-and-reach test. *J Strength Cond Res* 1994;8:91-94.

Diener MH, Golding LA, Diener D Validity and reliability of a one-minute half sit-up test of abdominal strength and endurance. *Res Sports Med* 1995;6:105-119.

Mannion AF, Connolly B, Wood K *et al.* The use of surface EMG power spectral analysis in the evaluation of back muscle function. *J Rehabil Res Dev* 1997;34:427-439.

Mathiowetz V Comparison of Rolyan and Jamar dynamometers for measuring grip strength. *Occup Ther Int* 2002;9:201-209.

Baumgartner TA, Gaunt SJ Construct related validity for the Baumgartner Modified pull-up test. *Meas Phys Educ Exerc Sci* 2005;9:51-60.

López-Miñarro P, Vaquero-Cristóbal R, Muyor JM *et al.* Criterion-related validity of sit-and-reach test as measure of hamstring extensibility in older women. *Nutr Hosp* 2015;32:312-317.

Silva P, Franco J, Gusmao A *et al.* Trunk strength is associated with sit-to-stand performance in both stroke and healthy subjects. *Eur J Phys Rehabil Med* 2015;51:717-724.

Broer MR, Galles NRG Importance of relationship between various body measurements in performance of the toe-touch test. *Res Q* 1958;29:253-263.

Hall GL, Hetzler RK, Perrin D *et al.* Relationship of timed sit-up tests to isokinetic abdominal strength. *Res Q Exerc Sport* 1992;63:80-84.

Härkönen R, Harju R, Alaranta H Accuracy of the Jamar dynamometer. *J Hand Ther* 1993;6:259-262.

Sparto PJ, Parnianpour M, Reinsel TE *et al.* Spectral and temporal responses of trunk extensor electromyography to an isometric endurance test. *Spine (Phila Pa 1976)* 1997;22:418-425; discussion 425-426.

Knudson D The validity of recent curl-up tests in young adults. *J Strength Cond Res* 2001;15:81-85.

- Youdas JW, Krause DA, Hollman JH Validity of hamstring muscle length assessment during the sit-and-reach test using an inclinometer to measure hip joint angle. *J Strength Cond Res* 2008;22:303-309.
- Bohannon RW, Bubela DJ, Magasi SR *et al.* Sit-to-stand test: Performance and determinants across the age-span. *Isokinet Exerc Sci* 2010;18:235-240.
- Ayala F, Sainz de Baranda P, De Ste Croix M *et al.* Reproducibility and concurrent validity of hip joint angle test for estimating hamstring flexibility in recreationally active young me. *J Strength Cond Res* 2012;26:2372-2382.
- Mier CM, Shapiro BS Sex differences in pelvic and hip flexibility in men and women matched for sit-and-reach score. *J Strength Cond Res* 2013;27:1031-1035.
- Taylor JD, Fletcher JP Correlation between the 8-repetition maximum test and isokinetic dynamometry in the measurement of muscle strength of the knee extensors: A concurrent validity study. *Physiother Theory Pract* 2013;29:335-341.
- Ten Hoor GA, Musch K, Meijer K *et al.* Test-retest reproducibility and validity of the back-leg-chest strength measurements. *Isokinet Exerc Sci* 2016;24:209-216.
- Clemons J Construct Validity of Two Different Methods of Scoring and Performing Push-ups. *J Strength Cond Res* 2019;33:2971-2980.
- Applegate ME, France CR, Russ DW *et al.* Sorensen test performance is driven by different physiological and psychological variables in participants with and without recurrent low back pain. *J Electromyogr Kinesiol* 2019;44:1-7.
- Mannion AF, Dolan P Electromyographic median frequency changes during isometric contraction of the back extensors to fatigue. *Spine (Phila Pa 1976)* 1994;19:1223-1229.
- Kankaanpää M, Laaksonen D, Taimela S *et al.* Age, sex, and body mass index as determinants of back and hip extensor fatigue in the isometric Sørensen back endurance test. *Arch Phys Med Rehabil* 1998;79:1069-1075.
- Shechtman O, Gestewitz L, Kimble C Reliability and validity of the DynEx dynamometer. *J Hand Ther* 2005;18:339-347.
- Coorevits P, Danneels L, Cambier D *et al.* Assessment of the validity of the Biering-Sørensen test for measuring back muscle fatigue based on EMG median frequency characteristics of back and hip muscles. *J Electromyogr Kinesiol* 2008;18:997-1005.
- Bui HT, Farinas M-I, Fortin A-M *et al.* Comparison and analysis of three different methods to evaluate vertical jump height. *Clin Physiol Funct Imaging* 2015;35:203-209.
- De Blaiser C, De Ridder R, Willems T *et al.* Reliability and validity of trunk flexor and trunk extensor strength measurements using handheld dynamometry in a healthy athletic population. *Phys Ther Sport* 2018;34:180-186.
- Kawano MM, Ambar G, Oliveira BIR *et al.* Influence of the gastrocnemius muscle on the sit-and-reach test assessed by angular kinematic analysis. *Braz J Phys Ther* 2010;14:10-15.
- España-Romero V, Ortega FB, Vicente-Rodríguez G *et al.* Elbow position affects handgrip strength in adolescents: validity and reliability of Jamar, DynEx, and TKK dynamometers. *J Strength Cond Res* 2010;24:272-277.

- Cadenas-Sanchez C, Sanchez-Delgado G, Martinez-Tellez B *et al.* Reliability and validity of different models of TKK hand dynamometers. *Am J Occup Ther* 2016;70:7004300010.
- Kolimechkov S, Castro-Piñero J, Petrov A *et al.* The effect of elbow position on the handgrip strength test in children: validity and reliability of TKK 5101 and DynX dynamometers. *Pedagogy Phys Cult Sports* 2020;24:240-247.
- Miyamoto K, Takebayashi H, Takimoto K *et al.* The criterion-related validity of the ten step test compared with motor reaction time. *J Phys Ther Sci* 2008;20:261-265.
- Miyamoto K, Takebayashi H, Takimoto K *et al.* A new simple performance test focused on agility in elderly people: The Ten Step Test. *Gerontology* 2008;54:365-372.

**Supplementary table S4.** Overview of field-based fitness tests criterion-related validity studies in adults.

| Author                                     | Participants             | Age       | Field-based Test                         | Gold standard                                                    | Statistical methods                            | Main outcome                                                                                                                                                                  | Conclusion                                                                                                                                           |
|--------------------------------------------|--------------------------|-----------|------------------------------------------|------------------------------------------------------------------|------------------------------------------------|-------------------------------------------------------------------------------------------------------------------------------------------------------------------------------|------------------------------------------------------------------------------------------------------------------------------------------------------|
| <i>Very low quality studies</i>            |                          |           |                                          |                                                                  |                                                |                                                                                                                                                                               |                                                                                                                                                      |
| <i>Cardiorespiratory fitness</i>           |                          |           |                                          |                                                                  |                                                |                                                                                                                                                                               |                                                                                                                                                      |
| Leger & Boucher 1980 [6]                   | Adults=25<br>(Healthy)   | 24.4±2.8  | The University Montreal track (UM-track) | Gas analyzer in maximal treadmill test (Modified Balke protocol) | Correlation coefficient (r), SEE               | r=0.96 (p<0.05), SEE= 2.81 ml/kg/min, between UM-track test and VO <sub>2max</sub> .                                                                                          | The UM-track test is accurate, valid and safe for young and middle-age adults, males and females, whether they are trained or not.                   |
| <i>Musculoskeletal fitness (isometric)</i> |                          |           |                                          |                                                                  |                                                |                                                                                                                                                                               |                                                                                                                                                      |
| Clemons et al. 2014 [71]                   | Females =31<br>(Healthy) | 19-36     | Modified flexed-arm hang                 | 1RM<br>(Absolute and relative isometric strength)                | Correlation coefficient (r), linear regression | r =0.10 (p=0.61) between modified flexed arm hang and absolute isometric strength.<br><br>r=0.88 (p< 0.001) between modified flexed arm hang and relative isometric strength. | Modified flexed-arm hang scores were not related to absolute strength, however, is a valid estimate of the construct of relative isometric strength. |
| <i>Musculoskeletal fitness (endurance)</i> |                          |           |                                          |                                                                  |                                                |                                                                                                                                                                               |                                                                                                                                                      |
| Clemons et al. 2004 [68]                   | Females=60<br>(Healthy)  | 20.7±2.15 | Flexed-arm hang                          | 1RM (absolute strength)<br><br>1RM/mass (relative strength)      | Correlation coefficient (r)                    | r ranges from -0.14 to 0.72 between flexed-arm hang and the different criterion measures.                                                                                     | No significant relationship was found between any of the flexed-arm hang variations and absolute strength or muscle                                  |



|                                    |                                        |         |                                                                                          | Repetitions at 70%<br>of 1RM (muscle<br>endurance) |                                |                                                                                                                                                                                        |                                                                                                                                                                                                                                                                                                                                                                             |
|------------------------------------|----------------------------------------|---------|------------------------------------------------------------------------------------------|----------------------------------------------------|--------------------------------|----------------------------------------------------------------------------------------------------------------------------------------------------------------------------------------|-----------------------------------------------------------------------------------------------------------------------------------------------------------------------------------------------------------------------------------------------------------------------------------------------------------------------------------------------------------------------------|
| Wood &<br>Baumgartner<br>2004 [69] | Females= 87<br>(Healthy)               | College | Bent-knee<br>push-up<br><br>Revised<br>push-up                                           | 1RM bench press                                    | Correlation coefficient<br>(r) | r =0.72 (p<0.01) between<br>U90° variation and relative<br>strength.<br><br>r=0.67 between bent-knee<br>push-up and bench press.<br>r=0.68 between revised<br>push-up and bench press. | endurance; however, all<br>flexed-arm hang variations<br>correlated significantly<br>with relative strength.<br><br>The validity for the bent-<br>knee push-up test is<br>acceptable, however,<br>somewhat more<br>questionable. Because the<br>validity coefficient for both<br>the bent-knee and the<br>revised push-up tests are<br>similar, either test can be<br>used. |
| Harvey & Scott<br>1967 [66]        | Females =60<br>(Healthy)               | College | Modified<br>curl-up<br>(30 s)<br><br>Curl-up                                             | Dynamometer<br>(Elgin Multiple<br>Angle)           | Correlation coefficient<br>(r) | r=0.44 (p<0.05) between<br>modified curl-up and<br>dynamometer scores.<br><br>r=0.32 (p<0.05) between<br>curl-up and dynamometer<br>scores.                                            | Both tests have low<br>validity.                                                                                                                                                                                                                                                                                                                                            |
| Berger 1966 [62]                   | Adults= 47<br>(Healthy)                | College | Two-<br>minute sit-<br>up                                                                | 1 RM sit-up                                        | Correlation coefficient<br>(r) | r=0.51 (p<0.05) between<br>two-minute sit-up and 1-RM<br>sit-up.                                                                                                                       | The two-minute sit-up test<br>is not valid to assess<br>endurance of the abdominal<br>muscles.                                                                                                                                                                                                                                                                              |
| Knudson &<br>Johnston 1995<br>[67] | Females = 10<br>Males= 10<br>(Healthy) | 19-32   | Modified<br>curl-up (2<br>min, legs<br>elevated<br>on a<br>bench,<br>hands<br>interlocke | Cibex isokinetic<br>dynamometer                    | Correlation coefficient<br>(r) | r= 0.38 (p=0.07) between<br>the modified curl-up and<br>isokinetic dynamometer.                                                                                                        | Modified curl-up test has<br>low validity.                                                                                                                                                                                                                                                                                                                                  |

|                                            |                                      |                        |                                                                                                                                                                                                                                 |                   |                             |                                                                                                                                                                                                                                                |                                                                                                                           |
|--------------------------------------------|--------------------------------------|------------------------|---------------------------------------------------------------------------------------------------------------------------------------------------------------------------------------------------------------------------------|-------------------|-----------------------------|------------------------------------------------------------------------------------------------------------------------------------------------------------------------------------------------------------------------------------------------|---------------------------------------------------------------------------------------------------------------------------|
|                                            |                                      |                        | d on the abdomen)                                                                                                                                                                                                               |                   |                             |                                                                                                                                                                                                                                                |                                                                                                                           |
| DeWitt 1944 [64]                           | Males = 102<br>(Healthy)             | College                | 1°<br>Modified curl-up<br>(touch knees with opposites elbow)<br><br>2°<br>Modified curl-up<br>(from setting, hands interlocke d behind the neck, touch knees with opposites elbow)<br><br>3°<br>Modified curl-up<br>(held feet) | Dynamometer       | Correlation coefficient (r) | 1° modified curl-up: strength, r=0.04; endurance, r=0.25 with dynamometer.<br><br>2° modified curl-up: strength, r=0.16; endurance, r=0.37 with dynamometer.<br><br>3° modified curl-up: strength, r=0.14; endurance, r=0.26 with dynamometer. | Modified curl-up variations have low validity.                                                                            |
| <i>Musculoskeletal fitness (explosive)</i> |                                      |                        |                                                                                                                                                                                                                                 |                   |                             |                                                                                                                                                                                                                                                |                                                                                                                           |
| Clemons et al. 2010 [70]                   | Females =24<br>Males=19<br>(Healthy) | 22.1±1.82<br>23.1±2.95 | Medicine ball put                                                                                                                                                                                                               | Bench press power | Correlation coefficient (r) | r=0.86 and 0.79 (p<0.01 for both) for female and male, respectively, between bench press power and medicine ball put.                                                                                                                          | The medicine ball put test is a valid method to use in assessing upper body power for both college-age males and females. |

### *Musculoskeletal fitness (flexibility)*

|                          |                          |         |                                                              |                           |                             |                                                                                                                                        |                                                                                                         |
|--------------------------|--------------------------|---------|--------------------------------------------------------------|---------------------------|-----------------------------|----------------------------------------------------------------------------------------------------------------------------------------|---------------------------------------------------------------------------------------------------------|
| Wells & Dillon 1952 [63] | Adults=100<br>(Healthy)  | College | Sit-and-reach                                                | The standing bobbing test | Correlation coefficient (r) | r=0.90 between the standing bobbing and sit-and-reach tests.                                                                           | The sit-and-reach is a valid test of back and leg flexibility.                                          |
| Mathews 1957 [65]        | Females =66<br>(Healthy) | College | Adapted Kraus-Weber floor touch test and Wells sit-and-reach | Leighton flexometer       | Correlation coefficient (r) | r=0.82 between adapted Kraus-Weber floor touch and Leighton flexometer.<br>r=0.74 between Wells sit-and-reach and Leighton flexometer. | Adapted Kraus-Weber floor touch and Wells sit-and-reach tests are valid test to assess hip flexibility. |

### *Low quality studies*

#### *Cardiorespiratory fitness*

|                                |                                                                |       |                            |                                        |                                 |                                                                             |                                                                                                                                        |
|--------------------------------|----------------------------------------------------------------|-------|----------------------------|----------------------------------------|---------------------------------|-----------------------------------------------------------------------------|----------------------------------------------------------------------------------------------------------------------------------------|
| Ritchie et al. 2005 [9]        | Females = 10<br>Males = 13<br>(Healthy)                        | 55-70 | 2-level step               | Gas analyzer in submaximal cycle test  | Correlation coefficient (r)     | r= -0.60 (p<0.001) between step test and submaximal exercise test.          | The 2-level step test was found to be a valid test.                                                                                    |
| Giacomantonio et al. 2020 [12] | Females = 16<br>Males = 12<br>(Risk of cardiovascular disease) | >17   | 6-minute step              | Gas analyzer in maximal treadmill test | Correlation coefficient (r), CI | r=0.88 (CI: 0.57-0.97) between 6-minute step test and VO <sub>2peak</sub> . | The 6-minute step test seems to be a valid option for assessing cardiorespiratory fitness of people at risk of cardiovascular disease. |
| Arcuri et al. 2015 [19]        | Females=49<br>Males=42<br>(Healthy)                            | 18-86 | 6-minute single 20-cm step | 6-minute walk test                     | Correlation coefficient (r)     | r=0.72 (p<0.001)                                                            | Six-minute single 20-cm step test is a valid test.                                                                                     |

|                                |                                         |            |                                       |                                                                                       |                                     |                                                                                                                                                                                            |                                                                                                                                                                                    |
|--------------------------------|-----------------------------------------|------------|---------------------------------------|---------------------------------------------------------------------------------------|-------------------------------------|--------------------------------------------------------------------------------------------------------------------------------------------------------------------------------------------|------------------------------------------------------------------------------------------------------------------------------------------------------------------------------------|
| Siconolfi et al.<br>1985 [8]   | Females= 19<br>Males= 29<br>(Healthy)   | 19-70      | 3-minute<br>single<br>25.4-cm<br>step | Gas analyzer in<br>submaximal cycle<br>test (Modified<br>Astrand-Rhyming<br>protocol) | Correlation coefficient<br>(r), SEE | r=0.92 (p=0.01) between<br>step test and directly<br>measured $\text{VO}_{2\text{max}}$ .<br>SEE=0.30 ml/kg/min.                                                                           | The 3-minute single 25.4-<br>cm step test protocol<br>provides valid estimates of<br>cardiorespiratory fitness<br>over a wide age range.                                           |
| Santa María et al.<br>1976 [7] | Males= 21<br>(Healthy)                  | 22.54±4.12 | USO step                              | Gas analyzer in<br>submaximal cycle<br>test (Astrand<br>method)                       | Correlation coefficient<br>(r)      | r=0.47 between USO step<br>test and $\text{VO}_{2\text{max}}$ .                                                                                                                            | USO step test seems to<br>have a poor validity.                                                                                                                                    |
| Hansen et al.<br>2011 [16]     | Females = 60<br>Males = 53<br>(Healthy) | 23-75      | Modified<br>Harvard<br>step           | Gas analyzer in<br>maximal cycle test                                                 | Paired t-tests                      | r =0.54 (p< 0.01) between<br>modified Harvard step test<br>and $\text{VO}_{2\text{max}}$ .                                                                                                 | Standardized fixed-rate<br>modified Harvard step test<br>elicited vigorous exercise<br>intensities, especially in<br>small, obese, and/or<br>physically deconditioned<br>subjects. |
| Lerche et al. 2017<br>[21]     | Females = 65<br>Males=60<br>(Healthy)   | 20-63      | Danish<br>step                        | Gas analyzer in<br>maximal treadmill<br>test                                          | Correlation coefficient<br>(r)      | r=0.56 and 0.66 (p<.001 for<br>both) between Danish step<br>test and $\text{VO}_{2\text{max}}$ for men and<br>women, respectively.                                                         | The Danish step test is a<br>valid assessment method<br>for women, however not<br>for men (under estimation<br>of cardiorespiratory<br>fitness).                                   |
| Leger et al. 1988<br>[13]      | Females = 24<br>Males = 53<br>(Healthy) | 18-50      | 20-m<br>shuttle run                   | Douglas bag<br>methods                                                                | Multiple regression,<br>SEE         | r=0.90 between $\text{VO}_{2\text{max}}$ and<br>maximal speed.<br>$Y=31.025+3.238*\text{speed}$<br>$+3.248*\text{age}+$<br>$0.1536*\text{speed}*\text{age}$ (r=0.71;<br>SEE=5.1 ml/kg/min) | 20-m shuttle run test is a<br>valid method to measure<br>$\text{VO}_{2\text{max}}$ in adult population.                                                                            |
| Jurgensen et al.<br>2015 [20]  | Females = 46                            | 18-46      | Incremental<br>shuttle                | Gas analyzer in<br>maximal treadmill                                                  | Correlation coefficient<br>(r)      | r=0.64 (p<0.05).                                                                                                                                                                           | The incremental shuttle<br>walking test had acceptable                                                                                                                             |

|                                  |                                       |       |                                                           |                                                          |                                                      |                                                                                                                                                                                                                                                                                       |                                                                                                                                                                                                                      |
|----------------------------------|---------------------------------------|-------|-----------------------------------------------------------|----------------------------------------------------------|------------------------------------------------------|---------------------------------------------------------------------------------------------------------------------------------------------------------------------------------------------------------------------------------------------------------------------------------------|----------------------------------------------------------------------------------------------------------------------------------------------------------------------------------------------------------------------|
|                                  | (Obese)                               |       | walking                                                   | test                                                     |                                                      |                                                                                                                                                                                                                                                                                       | validity is this population.                                                                                                                                                                                         |
| Mikawa & Senjyu et al. 2011 [18] | Males = 68<br>(Healthy)               | 40-59 | 15-m incremental shuttle walk and run<br>1500-m fast walk | Gas analyzer in maximal cycle test                       | Linear regression                                    | $r=0.86$ ( $p<0.01$ ) between 15-m incremental shuttle walk and run test and $VO_{2max}$ .<br>$r=0.52$ ( $p<0.01$ ) between 1500-m fast walk test and $VO_{2max}$ .                                                                                                                   | The 15-m incremental shuttle walk and run test is highly recommended as a field test for evaluating cardiorespiratory fitness in middle-aged adults. The 1500-m fast walk test is not valid test in this population. |
| Flouris et al. 2010 [14]         | Males = 45<br>(Healthy)               | 18-29 | 15-m square shuttle run                                   | Gas analyzer in maximal treadmill test                   | Correlation coefficients (r), linear regression      | $r=0.87-0.92$ ( $p<0.001$ ) between 15-m square shuttle run test and $VO_{2max}$ .                                                                                                                                                                                                    | 15-m square shuttle run test is a highly valid predictive test for $VO_{2max}$ .                                                                                                                                     |
| McGawley 2017 [11]               | Females = 5<br>Males = 5<br>(Healthy) | 32±7  | 4-minute running time trial                               | Gas analyzer in STEP treadmill test + VER phase          | Bland-Altman method, Two-way repeated measures ANOVA | Significant difference between STEP treadmill test and 4-minute running time trial ( $p=0.008$ ).<br><br>Mean difference= $1.6\pm3.6$ ml/kg/min ( $p=0.459$ ) for STEP treadmill test vs 4-minute running time trial.                                                                 | $VO_{2max}$ values attained during 4-minute running time trial were significantly lower than those attained during STEP.                                                                                             |
| Azmi & Sulaiman, 2017 [10]       | Females =15<br>(Healthy)              | 20-24 | Harvard step<br>20-m shuttle run<br>2.4-km<br>1-mile walk | Gas analyzer in maximal cycle test (Bruce protocol test) | Correlation coefficient (r)                          | $r=0.31$ ( $p=0.27$ ), between Harvard Step test and $VO_{2max}$ .<br>$r=0.64$ ( $p<0.05$ ), between 20-m shuttle run test and $VO_{2max}$ .<br>$r=0.42$ ( $p=0.13$ ), between 2.4-km run test and $VO_{2max}$ .<br>$r=0.18$ ( $p=0.52$ ), between 1-mile walk test and $VO_{2max}$ . | The most suitable cardiorespiratory test to measure $VO_{2max}$ in healthy females adults is the 20-m shuttle run test.                                                                                              |

|                          |                                         |       |               |                                                                                                  |                                                                      |                                                                                                                                                                          |                                                                                                     |
|--------------------------|-----------------------------------------|-------|---------------|--------------------------------------------------------------------------------------------------|----------------------------------------------------------------------|--------------------------------------------------------------------------------------------------------------------------------------------------------------------------|-----------------------------------------------------------------------------------------------------|
| Gabriel et al. 2010 [15] | Females = 66<br>(Healthy)               | 45-65 | 400-m walk    | Gas analyzer in maximal treadmill test                                                           | Spearman correlation coefficient ( $\rho$ )                          | $\rho = -0.43$ ( $p < 0.001$ ), between 400-m walk test and estimated $VO_{2max}$ .<br>$\rho = -0.56$ ( $p < 0.001$ ), between 400m walk test and measured $VO_{2max}$ . | The 400-m walk test is valid for estimating cardiorespiratory fitness in healthy middle-aged women. |
| Burr et al. 2011 [17]    | Females = 21<br>Males = 23<br>(Healthy) | 25-59 | 6-minute walk | Gas analyzer in maximal treadmill test (Modified Bruce protocol test)<br><br>Douglas bag methods | Spearman correlation coefficient ( $r$ ), multiple linear regression | $r = 0.49$ ( $p < 0.001$ ), between distance walked and $VO_{2max}$ .<br>$R^2 = 0.72$ ( $p < 0.05$ ), between prediction equation and $VO_{2max}$ .                      | The 6-minute walk test is valid for estimating cardiorespiratory fitness.                           |

*Musculoskeletal fitness (isometric)*

|                      |                                         |       |                                             |               |                                                |                                                                                                                                                                        |                                                                                                                                    |
|----------------------|-----------------------------------------|-------|---------------------------------------------|---------------|------------------------------------------------|------------------------------------------------------------------------------------------------------------------------------------------------------------------------|------------------------------------------------------------------------------------------------------------------------------------|
| Mathiowetz 2002 [78] | Females = 30<br>Males = 30<br>(Healthy) | 20-50 | Rolyan dynamometer<br><br>Jamar dynamometer | Known weights | Correlation coefficient ( $r$ ), paired t-test | $r = 0.99$ ( $p < 0.05$ ), between Rolyan and Jamar dynamometers with known weights.<br><br>Differences between Rolyan and Jamar dynamometer $< 2.3\%$ ( $p > 0.05$ ). | Rolyan and Jamar dynamometer measure equivalently for practical purposes and are valid test to assess isometric muscular strength. |
| Harkonen 1993 [84]   | NA                                      | NA    | Jamar dynamometer                           | Known weights | Errors                                         | Error $> 2$ kg was found for dynamometers that were purchased in the years 1985, 1986 and 1987.                                                                        | Jamar dynamometers seem to be rather accurate.                                                                                     |

*Musculoskeletal fitness (endurance)*

|                               |                                         |                      |                                          |                                                |                                                         |                                                                                                                                                                                                                                                               |                                                                                                                                                                                                                                                                                                                             |
|-------------------------------|-----------------------------------------|----------------------|------------------------------------------|------------------------------------------------|---------------------------------------------------------|---------------------------------------------------------------------------------------------------------------------------------------------------------------------------------------------------------------------------------------------------------------|-----------------------------------------------------------------------------------------------------------------------------------------------------------------------------------------------------------------------------------------------------------------------------------------------------------------------------|
| Baumgartner & Gaunt 2005 [79] | Females = 40<br>Males = 42<br>(Healthy) | 21.1±3.8<br>21.0±1.6 | Baumgartner modified pull-up             | 1 RM bench press<br>Modified lateral pull-down | Correlation coefficient (r)                             | r=0.61 females and r=0.67 males, between Baumgartner modified pull-up and bench press.<br><br>r=0.60 females and r=0.85 males, between Baumgartner modified pull-up and modified lateral pull-down.                                                           | Baumgartner modified pull-up test is valid to assess arm and shoulder girdle muscular strength and endurance in college men and women.                                                                                                                                                                                      |
| Clemons et al. 2018 [93]      | Males = 31<br>(Healthy)                 | 18-29                | Standard push-up<br>Hand-release push-up | 1 RM bench press                               | Correlation coefficient (r), multiple linear regression | r=0.25 (p=0.18) and r=0.7 (p<0.001) between standard push-up with absolute and relative 1RM.<br><br>rho= -0.05 (p=0.787) and rho=0.39 (p<0.05) between hand-release push-up with absolute and relative 1RM.                                                   | Standard push-up has moderate validity to assess relative upper body endurance strength but not absolute.<br><br>Hand-release push-up is not valid test to assess absolute and relative upper body endurance strength.                                                                                                      |
| Bohannon et al. 2010 [88]     | Females =111<br>Males=70<br>(Healthy)   | 14-85                | 5-repetition sit-to-stand                | Isokinetic dynamometer strength                | Correlation coefficient (r), multiple linear regression | r = -0.54 and -0.56 (p<0.001 for both) between isokinetic strength and 5-repetition sit-to-stand test for 14-85 years and 50-85 years respectively.<br><br>$R^2=0.30$ isokinetic strength predicting 5-repetition sit-to-stand test in 14-85 and 50-85 group. | There is a significant relationship between knee extension strength and 5-repetition sit-to-stand test. Nevertheless, knee extension strength alone provides an insufficient explanation of 5-repetition sit-to-stand test performance. Age, body weight, and stature also influence 5-repetition sit-to-stand performance. |
| Silva et al. 2015 [81]        | Stroke = 18                             | >= 20                | 5-repetition                             | Isokinetic dynamometer                         | Correlation coefficient                                 | r range from -0.41 to -0.51 (all p<0.05) between total                                                                                                                                                                                                        | 5-repetition sit-to-stand test obtained from low to                                                                                                                                                                                                                                                                         |

|                           |                                         |       |                                                |                                                   |                                                         |                                                                                                                                                                                                                                                                                                                                                   |                                                                                                                |
|---------------------------|-----------------------------------------|-------|------------------------------------------------|---------------------------------------------------|---------------------------------------------------------|---------------------------------------------------------------------------------------------------------------------------------------------------------------------------------------------------------------------------------------------------------------------------------------------------------------------------------------------------|----------------------------------------------------------------------------------------------------------------|
|                           | Healthy = 18                            |       | sit-to-stand                                   | strength                                          | (r)                                                     | duration of 5-repetition sit-to-stand test and strength of the trunk muscles                                                                                                                                                                                                                                                                      | moderate correlation with trunk muscular strength.                                                             |
| Taylor et al. 2013 [91]   | Females = 15<br>Males = 15<br>(Healthy) | 23±1  | 8-repetition maximum test of knee extensors    | Isokinetic dynamometer strength                   | Correlation coefficient (r), linear regression          | $R^2 = 0.73, 0.73$ and $0.51$ (all $p < 0.001$ ) between for peak torques at 60, 120 and 240 degrees per second, respectively, between 8-repetition and isokinetic strength.                                                                                                                                                                      | 8-repetition maximum testing of knee extensors can be used as a valid measure of lower body muscular strength. |
| Ten Hoor et al. 2016 [92] | Females = 22<br>Males = 23<br>(Healthy) | 18-35 | Back-leg-chest                                 | Isokinetic dynamometer strength                   | Correlation coefficient (r), stepwise linear regression | $r$ range from $0.56$ to $0.81$ (all $p < 0.01$ ) and from $0.60$ to $0.71$ (all $p < 0.01$ ) between back-leg-chest and criterion measures in males and females respectively.<br><br>$R^2 = 0.74$ for dominant knee extensor and flexor strength predicting back-leg-chest strength.<br><br>$R^2 = 0.86$ for predicting back-leg-chest strength. | Back-leg-chest test can be used to evaluate changes in muscular strength in adults.                            |
| Diener et al. 1995 [76]   | Females = 21<br>Males = 15<br>(Healthy) | 17-68 | Modified curl-up (reach 8.89cm with fingertip) | Isometric spine flexion strength (strength table) | Correlation coefficient (r)                             | $r = 0.44$ ( $p < 0.01$ ) between the modified curl-up test and isometric abdominal strength.                                                                                                                                                                                                                                                     | Modified curl-up test is not valid to measure abdominal muscular strength and endurance.                       |



|                          |                                                |          |                                                                                                   |                                    |                                                     |                                                                                                                                                                                                                                                                                                                                                                                                                                                                                                                                                                                                                                    |                                                                                                                      |
|--------------------------|------------------------------------------------|----------|---------------------------------------------------------------------------------------------------|------------------------------------|-----------------------------------------------------|------------------------------------------------------------------------------------------------------------------------------------------------------------------------------------------------------------------------------------------------------------------------------------------------------------------------------------------------------------------------------------------------------------------------------------------------------------------------------------------------------------------------------------------------------------------------------------------------------------------------------------|----------------------------------------------------------------------------------------------------------------------|
| Ritchie et al. 2005 [9]  | Females = 10<br>Males = 13<br>(Healthy)        | 55-70    | Sit-to-stand<br><br>Lift and reach                                                                | 1RM bench press,<br>1RM leg press, | Correlation coefficient (r)                         | r=0.68 (p<0.05) between sit-to-stand test and 1RM leg press.<br><br>r=0.43 (p>0.05) between lift and reach and 1RM bench press.                                                                                                                                                                                                                                                                                                                                                                                                                                                                                                    | Only sit-to-stand was found to be valid when compared 1RM test.<br><br>Single timed chair raise is not a valid test. |
| Knudson et al. 2001 [86] | Females = 22<br>Males = 22<br>(Healthy-active) | 25.8±5.0 | Curl-up<br><br>Modified curl-up (90s, legs elevated on a bench, hands interlocked on the abdomen) | Isokinetic dynamometer strength    | Correlation coefficient (r), linear regression, SEE | r=0.36, SEE=0.10 and r=0.21, SEE=0.11 (p>0.05 for both) between the curl-up and isokinetic muscular strength for men and women, respectively.<br><br>r=0.50, SEE=0.08 and r=0.46, SEE=0.08 (p<0.05 for both) between the curl-up and isokinetic muscular endurance for men and women, respectively.<br><br>r=0.07, SEE=0.10 and r= -0.19, SEE=0.10 (p>0.05 for both) between the modified curl-up and isokinetic muscular strength for men and women, respectively.<br><br>r=0.23, SEE=0.09 and r=0.10, SEE=0.09 (p>0.05 for both) between the modified curl-up and isokinetic muscular endurance for men and women, respectively. | The curl-up test and the modified curl-up have weak validity to assess abdominal muscular strength and endurance.    |

|                             |                                         |                      |                                                                                                                                                                                                                                                  |                                       |                                                           |                                                                                                                                                                                                                                                                                                                                                                                                                                                                                                                                                                                                                                                                                                                                                                                |                                                                                                                       |
|-----------------------------|-----------------------------------------|----------------------|--------------------------------------------------------------------------------------------------------------------------------------------------------------------------------------------------------------------------------------------------|---------------------------------------|-----------------------------------------------------------|--------------------------------------------------------------------------------------------------------------------------------------------------------------------------------------------------------------------------------------------------------------------------------------------------------------------------------------------------------------------------------------------------------------------------------------------------------------------------------------------------------------------------------------------------------------------------------------------------------------------------------------------------------------------------------------------------------------------------------------------------------------------------------|-----------------------------------------------------------------------------------------------------------------------|
| Hall et al. 1992<br>[83]    | Females = 28<br>Males = 23<br>(Healthy) | 22.2±4.6<br>23.1±7.4 | 1°<br>Modified<br>curl-up<br>(knees<br>extend,<br>hand<br>interlocked<br>behind the<br>neck, held<br>feet, flex<br>up to 90°)<br>2°<br>Modified<br>curl-up<br>(arm<br>folded<br>across the<br>chest, feet<br>held, flex<br>up to 90°)<br>Curl-up | Isokinetic<br>dynamometer<br>strength | Correlation coefficient<br>(r)                            | 1° Modified Curl-up: r=0.42<br>and 0.40 (p<0.01, for both)<br>in males, for concentric and<br>eccentric peak torque,<br>respectively; and r=-0.18<br>and -0.21 (p>0.05 for both)<br>in females for concentric and<br>eccentric peak torque,<br>respectively.<br>2° Modified Curl-up: r=-0.07<br>and -0.08 (p>0.05 for both)<br>in males, for concentric and<br>eccentric peak torque,<br>respectively; and r=-0.41<br>and -0.38 (p<0.01, for both)<br>in females for concentric and<br>eccentric peak torque,<br>respectively.<br>Curl-up: r=0.27 (p>0.05)<br>and 0.32 (p<0.01) in males,<br>for concentric and eccentric<br>peak torque, respectively;<br>and r=-0.25 and -0.28<br>(p>0.05 for both) in females<br>for concentric and eccentric<br>peak torque, respectively. | The use of timed curl-up<br>test is not a valid method of<br>estimating isokinetic<br>abdominal muscular<br>strength. |
| Mannion et al.<br>1997 [77] | Female = 17<br>Male = 17<br>(healthy)   | 19-48                | Modified<br>Biering-<br>Sørensen                                                                                                                                                                                                                 | Electromyography                      | Simple and multiple<br>linear regression,<br>ANOVA/ANCOVA | R <sup>2</sup> =0.85 and 0.57, (p<0.05<br>for both) between time<br>endurance and median<br>frequency of left and right<br>lumbar region.                                                                                                                                                                                                                                                                                                                                                                                                                                                                                                                                                                                                                                      | The Biering-Sørensen test<br>is valid for measuring back<br>muscle fatigue.                                           |

|                                              |                                                               |                                                          |                  |                   |                                                     |                                                                                                                                                                                                                                                                            |                                                                                                                                                                                                  |
|----------------------------------------------|---------------------------------------------------------------|----------------------------------------------------------|------------------|-------------------|-----------------------------------------------------|----------------------------------------------------------------------------------------------------------------------------------------------------------------------------------------------------------------------------------------------------------------------------|--------------------------------------------------------------------------------------------------------------------------------------------------------------------------------------------------|
|                                              |                                                               |                                                          |                  |                   |                                                     | No difference between the greatest power spectrum and endurance time ( $p>0.05$ ).                                                                                                                                                                                         |                                                                                                                                                                                                  |
| Sparto et al. 1997 [85]                      | Male = 10<br>(healthy)                                        | 20-32                                                    | Biering-Sørensen | Electromyography  | Linear regression, MANOVA for repeated measurements | $R^2=0.88$ ( $p<0.05$ ) between median frequency and time test.<br><br>There was not significant level among lumbar level, muscle location and endurance time ( $p>0.05$ ).                                                                                                | The Biering-Sørensen test is valid for measuring back muscle fatigue.                                                                                                                            |
| Applegate et al. 2019 [94]                   | Female = 24<br>Male = 24<br>(Healthy and low back pain (50%)) | 29.2±2.2<br>(Healthy)<br><br>24.3±1.5<br>(Low back pain) | Biering-Sørensen | Electromyography  | Hierarchical and stepwise linear regression         | $R^2=0.56$ ( $p<0.001$ ) between time test with normalized median power frequency slope of the erector spinae ( $\beta=0.350$ , $p<0.01$ ), the biceps femoris ( $\beta=0.375$ , $p<0.01$ ), and self-efficacy ( $\beta=0.437$ , $p<0.01$ ).                               | The Biering-Sørensen test has moderate validity for measuring back muscle fatigue in healthy adults. In adults with low back pain self-efficacy and trunk mass appears to be the best predictor. |
| <i>Musculoskeletal fitness (flexibility)</i> |                                                               |                                                          |                  |                   |                                                     |                                                                                                                                                                                                                                                                            |                                                                                                                                                                                                  |
| Jackson & Langford 1989 [73]                 | Females = 52<br>Males = 52<br>(Healthy)                       | 20-45                                                    | Sit-and-reach    | Manual goniometer | Correlation coefficients (r)                        | $r=0.70$ between the sit-and-reach test and hamstring flexibility; and $r=0.12$ with low back flexibility, in female respectively.<br><br>$r=0.89$ between the sit-and-reach test and hamstring flexibility; and $r=0.59$ with low back flexibility, in male respectively. | The sit-and-reach test appears to possess moderate validity as a measure of hamstring flexibility, but is not a valid measure of low back flexibility.                                           |

|                                   |                                         |                      |                                                                       |                                                                                                      |                                                   |                                                                                                                                                                                                                                                                                                                               |                                                                                                                                                  |
|-----------------------------------|-----------------------------------------|----------------------|-----------------------------------------------------------------------|------------------------------------------------------------------------------------------------------|---------------------------------------------------|-------------------------------------------------------------------------------------------------------------------------------------------------------------------------------------------------------------------------------------------------------------------------------------------------------------------------------|--------------------------------------------------------------------------------------------------------------------------------------------------|
| Youdas et al.<br>2008 [87]        | Males=106<br>Females=106<br>(Healthy)   | 20-79                | Sit-and-<br>reach                                                     | Passive straight leg<br>raise                                                                        | Correlation coefficient<br>(r)                    | r = 0.59 (p<0.01) between<br>sit-and-reach test and<br>passive straight leg raise.                                                                                                                                                                                                                                            | Sit-and-reach test is not a<br>valid method to measure<br>hip joint angle.                                                                       |
| Mier et al. 2013<br>[90]          | Females = 35<br>Males = 35<br>(Healthy) | 23±4                 | Sit-and-<br>reach                                                     | Pelvic angle during<br>sit-and-reach and<br>hip joint angle<br>during passive<br>straight leg raise. | Correlation coefficient<br>(r), paired t-test     | r=0.82 (CI: 0.70-0.89) and<br>0.83 (CI: 0.72-0.90) between<br>sit-and-reach scores and<br>pelvic angle for men and<br>women, respectively.<br><br>r=0.60 (CI: 0.39-0.75) and<br>0.56 (CI: 0.33-0.73) between<br>sit-and-reach scores and<br>passive straight leg raise hip<br>joint angle for men and<br>women, respectively. | Sit-and-reach score does<br>not adequately assess spine<br>and pelvic flexibility.                                                               |
| López-Miñarro et<br>al. 2015 [80] | Females=120<br>(Healthy)                | 62,34±8,75           | Sit-and-<br>reach                                                     | Passive straight leg<br>raise test                                                                   | Correlation coefficient<br>(r), linear regression | R <sup>2</sup> =0.50, 0.45 and 0.49 (all<br>p<0.001) between sit-and-<br>reach and straight leg raise<br>test for left, right and both<br>legs, respectively.                                                                                                                                                                 | The validity of sit-and-<br>reach test as measure of<br>hamstring muscle<br>extensibility on older<br>women is moderate.                         |
| Liemohn et al<br>1994 [75]        | Females = 20<br>Males = 20<br>(Healthy) | 25.1±6.2<br>24.0±4.6 | Sit-and-<br>reach,<br><br>Modified<br>sit-and-<br>reach<br>(Cailliet) | Lumbar spine range<br>with Inclinometer                                                              | Correlation coefficient<br>(r)                    | r=0.56 and 0.68 (p<0.01, for<br>both) as measures of low<br>back flexibility in females<br>for sit-and-reach and<br>modified tests, respectively.<br><br>r=0.31 and 0.33 (p>0.05, for<br>both) as measures of low<br>back flexibility in males for<br>sit-and-reach and modified<br>tests, respectively.                      | The sit-and-reach test and<br>its modified, do not have<br>criterion-related validity as<br>a field test of low back<br>flexion range of motion. |

|                           |                                        |                      |                                                                                                  |                                                              |                                 |                                                                                                                                                                                                                                                      |                                                                                                                                                                                                                                             |
|---------------------------|----------------------------------------|----------------------|--------------------------------------------------------------------------------------------------|--------------------------------------------------------------|---------------------------------|------------------------------------------------------------------------------------------------------------------------------------------------------------------------------------------------------------------------------------------------------|---------------------------------------------------------------------------------------------------------------------------------------------------------------------------------------------------------------------------------------------|
| Cotten 1972 [72]          | Females= 38<br>Males= 37<br>(Healthy)  | College              | Sit-and-reach<br><br>Modified sit-and-reach<br><br>Cureton test<br><br>Scott-French bobbing test | Leighton flexometer                                          | Correlation coefficient (r)     | r= 0.65 between sit-and-reach and flexometer.<br><br>r= 0.66 between Modified sit-and-reach and flexometer.<br><br>r= 0.43 between Cureton test and flexometer.<br><br>r= 0.52 between Scott-French bobbing test and flexometer.                     | None of these tests should be considered interchangeable with the Leighton flexometer.                                                                                                                                                      |
| Broer & Galles 1958 [82]  | Females=100<br>(Healthy)               | 18-31                | Toe-touch                                                                                        | Leighton Flexometer                                          | Correlation coefficient (r)     | r=0.81 between Toe-touch test and flexometer measures.                                                                                                                                                                                               | A study of a group which is known to include more extreme body types is needed for a more detailed validation of the toe-touch test.                                                                                                        |
| Kipper & Parker 1987 [74] | Females =16<br>Males = 17<br>(Healthy) | 22.1±3.8<br>21.1±3.0 | Toe-touch                                                                                        | Trunk, hip and vertical flexion, were assessed with a camera | Correlation coefficient (r)     | r=0.85 (p<0.001) between vertical fingertip-floor distances and trunk flexion.<br><br>r=0.79 (p < 0.001) between vertical fingertip-floor distances and hip flexion.<br><br>r=0.10 between vertical fingertip-floor distances and vertebral flexion. | The vertical fingertip-floor distances a valid measure of hip flexion with the knees extended, although it should not be considered an indication of hip flexion also if the knees are allowed to flex, relieving hamstring muscle tension. |
| Ayala et al. 2012 [89]    | Males=70<br>(Active recreationally)    | 21.3±2.5             | Horizontal hip joint angle                                                                       | Straight leg raise test with an inclinometer                 | Multiple linear regression, SEE | Between horizontal hip joint angle test and passive straight leg raise test $\beta = 0.78$ , SEE=0.10, $R^2=0.62$ , $p<0.01$ .                                                                                                                       | The validity of horizontal hip joint angle test and vertical hip joint angle test is moderate. Furthermore, the horizontal hip joint                                                                                                        |

Vertical  
hip joint  
angle

Between vertical hip joint  
angle test and passive  
straight leg raise test  $\beta =$   
0.80, SEE=0.10,  $R^2=0.63$ ,  
 $p<0.01$ .

angle test cutoff scores  
should not be used for  
vertical hip joint angle test  
for the detection of short  
hamstring muscles in  
young adults.

### *Motor fitness (balance)*

|                                |                                           |       |                 |                                                                            |                                |                                                                                                                                                                                                                                             |                                                                                              |
|--------------------------------|-------------------------------------------|-------|-----------------|----------------------------------------------------------------------------|--------------------------------|---------------------------------------------------------------------------------------------------------------------------------------------------------------------------------------------------------------------------------------------|----------------------------------------------------------------------------------------------|
| Miyamoto et al.<br>2008a [105] | Females = 103<br>Males = 49<br>(Healthy)  | 71±13 | Ten step        | Motor reaction time<br>Knee muscle<br>strength<br>Functional reach<br>test | Correlation coefficient<br>(r) | $r=0.59$ ( $p<0.01$ ) between ten<br>step test and motor reaction<br>time.<br>$r=-0.35$ ( $p<0.01$ ) between<br>ten step test and knee muscle<br>strength.<br>$r=-0.42$ ( $p<0.01$ ) between<br>ten step test and functional<br>reach test. | Ten step test is a more<br>useful measurement of<br>agility than previous test<br>batteries. |
| Miyamoto et al.<br>2008b [106] | Females = 562<br>Males = 266<br>(Healthy) | 22-99 | Ten step        | Motor reaction<br>time,<br>Single leg standing<br>time                     | Correlation coefficient<br>(r) | $r=0.68$ and $0.59$ ( $p<0.01$ for<br>both) between ten step test<br>and time supine-to-stand and<br>between ten step test and<br>motor reaction time<br>respectively.                                                                      | Ten step test is a valid tool<br>to asses agility.                                           |
| Ritchie et al. 2005<br>[9]     | Females = 10<br>Males = 13                | 55-70 | Romberg<br>test | Change centre of<br>pressure                                               | Correlation coefficient<br>(r) | r ranges from -0.18 to 0.23<br>( $p>0.05$ for all) between<br>balance test and change to<br>centre of pressure.                                                                                                                             | Romberg test were found to<br>be a not valid test to assess<br>static balance.               |

### *High quality studies*

### Cardiorespiratory fitness

|                           |                                          |       |                                   |                                           |                                                               |                                                                                                                                                                                                                                                                                                                                                                                                                                 |                                                                                                                                                    |
|---------------------------|------------------------------------------|-------|-----------------------------------|-------------------------------------------|---------------------------------------------------------------|---------------------------------------------------------------------------------------------------------------------------------------------------------------------------------------------------------------------------------------------------------------------------------------------------------------------------------------------------------------------------------------------------------------------------------|----------------------------------------------------------------------------------------------------------------------------------------------------|
| Weller et al. 1992 [26]   | Females = 78<br>Males = 76<br>(Healthy)  | 15-69 | Modified Canadian aerobic fitness | Gas analyzer in maximal treadmill test    | Linear regression, ICC                                        | $R^2=0.75$ ( $p<0.05$ ) and $ICC=0.81$ , between prediction equation and $VO_{2max}$ .                                                                                                                                                                                                                                                                                                                                          | Modified Canadian aerobic fitness test offers an improved method for estimating $VO_{2max}$ .                                                      |
| Carvalho et al. 2015 [37] | Females=31<br>(Sedentary obese and lean) | 20-45 | 6-minute single 15-cm step        | Gas analyzer in submaximal treadmill test | Correlation coefficients (r), multiple linear regression, SEE | $r=0.80, 0.79$ and $0.31$ (all $p<0.05$ ) between number of step cycles and $VO_{2peak}$ in total sample, lean and obese females.<br><br>The final model explained 83% of the total variance in $VO_{2peak}$ during treadmill test. The reference equation obtained was: $VO_{2peak}=35.335 - (0.328 \times BMI) + (0.069 \times NSC) - (0.298 \times age)$ , with a $SEE=2.9$ ml/kg/min (Durbin-Watson test = 2.2; $p<0.01$ ). | The step cycles of Six-minute single 15-cm step test with BMI, and age, accurately predict $VO_{2peak}$ in both, obese and lean sedentary females. |
| Teren et al. 2016 [38]    | Females = 38<br>Males = 48<br>(Healthy)  | 45-66 | YMCA step                         | Gas analyzer in maximal treadmill test    | Correlation coefficient (r), linear regression                | $r=0.64$ ( $p<0.001$ ) between $VO_2$ YMCA step test and $VO_{2peak}$ .<br><br>Age, gender, BMI and YMCA step test explained the 91% of the variance of $VO_{2peak}$ ( $p<0.05$ ).                                                                                                                                                                                                                                              | YMCA step test equation proved be convenient for estimating individual $VO_{2peak}$ .                                                              |

|                          |                                         |                      |                                                     |                                                                  |                                                                     |                                                                                                                                                                                                                                                                                                                                                                                                                                                                                                                       |                                                                                                                           |
|--------------------------|-----------------------------------------|----------------------|-----------------------------------------------------|------------------------------------------------------------------|---------------------------------------------------------------------|-----------------------------------------------------------------------------------------------------------------------------------------------------------------------------------------------------------------------------------------------------------------------------------------------------------------------------------------------------------------------------------------------------------------------------------------------------------------------------------------------------------------------|---------------------------------------------------------------------------------------------------------------------------|
| Beutner et al. 2015 [52] | Females=56<br>Males=55<br>(Healthy)     | 22-79                | YMCA step                                           | Gas analyzer in maximal cycle test (Bruce protocol)              | Correlation coefficient (r), linear regression, SEE                 | r=0.86 (p<0.001), SEE= 5.5 ml/kg/min                                                                                                                                                                                                                                                                                                                                                                                                                                                                                  | The YMCA step test is appropriate for estimating individual VO <sub>2peak</sub> .                                         |
| Lee et al. 2019 [60]     | Female and Male=568<br>(Healthy)        | 20-66                | YMCA step                                           | Gas analyzer in maximal treadmill test (Bruce protocol)          | Multiple linear regression, SEE, repeated ANOVA                     | r= -0.44 (p<0.001) between VO <sub>2max</sub> and heart rate recovery.<br><br>Equation of YMCA step test: R <sup>2</sup> =0.60 (p<0.05), SEE=4.76 ml/kg/min, mean difference=0.14±1.23 ml/kg/min (p>0.05).                                                                                                                                                                                                                                                                                                            | The YMCA step test is accurate for estimating individual VO <sub>2peak</sub> .                                            |
| Hong et al. 2019 [59]    | Females = 36<br>Males = 37<br>(Healthy) | 32.3±8.9<br>29.4±9.5 | YMCA step<br><br>Tecumseh step<br><br>6-minute walk | Gas analyzer in maximal treadmill test (Modified Bruce protocol) | Multiple linear regression, SEE, paired t-test, Bland-Altman method | r=0.5281 (p<0.001) between VO <sub>2max</sub> and heart rate 30s in Tecumseh step test.<br><br>Equation of Tecumseh step test: R <sup>2</sup> =0.734 (p<0.05), SEE=4.7 ml/kg/min, no mean difference (p>0.05).<br><br>r=0.682 (p<0.001) between VO <sub>2max</sub> and heart rate 30s in YMCA step test.<br><br>Equation of YMCA step test: R <sup>2</sup> =0.722 (p<0.05), SEE=4.7 ml/kg/min, no mean difference (p>0.05).<br><br>r=0.671 (p<0.001) between VO <sub>2max</sub> and distance walked in 6-minute test. | The YMCA step, Tecumseh step and 6-minute walk tests are valid for estimating VO <sub>2max</sub> in young healthy adults. |



|                         |                                      |                                  |                       |                                                         |                                                                          |                                                                                                                                                                                                                                                                                                                                                                                                                                                                                                           |                                                                                                                                                                                 |
|-------------------------|--------------------------------------|----------------------------------|-----------------------|---------------------------------------------------------|--------------------------------------------------------------------------|-----------------------------------------------------------------------------------------------------------------------------------------------------------------------------------------------------------------------------------------------------------------------------------------------------------------------------------------------------------------------------------------------------------------------------------------------------------------------------------------------------------|---------------------------------------------------------------------------------------------------------------------------------------------------------------------------------|
|                         |                                      |                                  |                       |                                                         |                                                                          | Equation of 6-minute walk test: $R^2=0.744$ ( $p<0.05$ ), $SEE=4.6$ ml/kg/min, no mean difference ( $p>0.05$ ).                                                                                                                                                                                                                                                                                                                                                                                           |                                                                                                                                                                                 |
| Kieu et al. 2020 [43]   | Female and Male=30 (Healthy)         | 19-35                            | YMCA step             | Gas analyzer in maximal treadmill test (Bruce protocol) | Correlation coefficient paired t-test, Bland-Altman method               | <p><math>r=0.80</math> (<math>p&lt;0.001</math>) between <math>VO_{2max}</math> measured and <math>VO_{2ma}</math> predicted.</p> <p>Mean difference=<math>2.26\pm5.47</math> ml/kg/min (<math>p&lt;0.001</math>).</p>                                                                                                                                                                                                                                                                                    | The YMCA step test, is valid for estimating $VO_{2max}$ in young healthy adults.                                                                                                |
| Hansen et al. 2016 [55] | Females = 59<br>Males = 53 (Healthy) | 18-75                            | Modified Harvard step | Gas analyzer in maximal cycle test                      | Correlation coefficient (r), linear regression, Bland-Altman method, ICC | <p><math>r= -0.48</math> and <math>0.52</math> (<math>p&lt;0.001</math> for both) between <math>VO_{2max}</math> and heart rate and step test duration.</p> <p>Equation of modified Harvard step test: <math>R^2=0.78</math> (<math>p&lt;0.00</math>)</p> <p>Mean difference=<math>0.0\pm0.4</math> L/min (<math>p=1.000</math>), between measured and predicted <math>VO_{2max}</math></p> <p>ICC=<math>0.94</math> (<math>p&lt;0.001</math>) between measured and predicted <math>VO_{2max}</math>.</p> | The equation developed is valid to estimate $VO_{2max}$ in healthy adults. However, only the test performance (heart rate) is not valid for estimating individual $VO_{2max}$ . |
| Aadahl et al. 2012 [49] | Females=449<br>Males= 346 (Healthy)  | 47.0 $\pm$ 8.0<br>46.7 $\pm$ 8.4 | Danish step           | Gas analyzer in maximal cycle test (Watt-max protocol)  | Correlation coefficient (r), Bland-Altman method                         | <p><math>r=0.69</math> and <math>0.77</math> (<math>p&lt;0.001</math> both) between Danish step test and <math>VO_{2max}</math>, for male and female, respectively.</p> <p>Mean difference=<math>2.25\pm13.45</math> and <math>3.06\pm10.68</math> ml/kg/min, for male and female,</p>                                                                                                                                                                                                                    | The Danish step test slightly overestimated $VO_{2max}$ compared to the watt-max test, more so in female than in male.                                                          |

respectively.

|                          |                                                        |            |                                             |                                                                  |                                                                                                       |                                                                                                                                                                                                                                                                        |                                                                                                                                   |
|--------------------------|--------------------------------------------------------|------------|---------------------------------------------|------------------------------------------------------------------|-------------------------------------------------------------------------------------------------------|------------------------------------------------------------------------------------------------------------------------------------------------------------------------------------------------------------------------------------------------------------------------|-----------------------------------------------------------------------------------------------------------------------------------|
| Kumar et al. 2012 [35]   | Males = 19<br>(Healthy-sedentary)                      | 20-30      | Queen's College step                        | Gas analyzer in maximal cycle test                               | Correlation coefficient (r), linear regression, paired t-test, Bland-Altman method                    | r = 0.034 (p < 0.05) between Queen's College step test and VO <sub>2max</sub> .<br><br>Mean difference = 20 ± 15.31 ml/kg/min.                                                                                                                                         | Queen's College step test is not a valid test for this population.                                                                |
| Ricci et al. 2019 [41]   | Female = 31<br>(Obese with comorbidities and morbidly) | 18-60      | 2-minute step                               | Gas analyzer in maximal treadmill test (Bruce protocol)          | Correlation coefficient (r), stepwise multiple linear regression, student t-test, Bland-Altman method | r = 0.55 (p < 0.01) between up-and-down step cycles and VO <sub>2max</sub> .<br><br>Equation of 2-minute step test: R <sup>2</sup> = 0.744 (p < 0.001).<br><br>Mean difference = 3.1 ± 3.0 ml/kg/min (p < 0.05).                                                       | The 2-minute step test underestimated VO <sub>2max</sub> .                                                                        |
| Cooper et al. 2005 [34]  | Males = 30<br>(Healthy active)                         | 21.8 ± 3.6 | 20-m shuttle run                            | Gas analyzer in maximal treadmill test                           | Paired t-test, Bland-Altman method,                                                                   | Mean difference = 1.8 ± 6.3 ml/kg/min (p = 0.004)                                                                                                                                                                                                                      | 20-m shuttle run test is not a valid test for estimating individual VO <sub>2max</sub> in active males.                           |
| Flouris et al. 2004 [33] | Males = 50<br>(Healthy)                                | 21.6 ± 1.6 | 20-m shuttle run<br>20-m square shuttle run | Gas analyzer in maximal treadmill test (Modified Bruce protocol) | linear regression, SEE, CV, one-way ANOVA                                                             | Equation of 20-m shuttle run test: r = 0.61 (p < 0.05), SEE = 4.23 ml/kg/min, mean difference = -2.0 ± 2.9 ml/kg/min (p < 0.001), CV = 7.9%.<br><br>Equation of 20-m square shuttle run test: r = 0.88 (p < 0.001), SEE = 2.51 ml/kg/min, mean difference = -0.7 ± 0.3 | The 20-m square shuttle run test had a higher agreement with the gold standard laboratory test in predicting VO <sub>2max</sub> . |

|                                   |                                             |           |                                                          |                                                                           |                                                                                               |                                                                                                                                                                                                                                                           |                                                                                                                                                                                                                    |
|-----------------------------------|---------------------------------------------|-----------|----------------------------------------------------------|---------------------------------------------------------------------------|-----------------------------------------------------------------------------------------------|-----------------------------------------------------------------------------------------------------------------------------------------------------------------------------------------------------------------------------------------------------------|--------------------------------------------------------------------------------------------------------------------------------------------------------------------------------------------------------------------|
|                                   |                                             |           |                                                          |                                                                           |                                                                                               | ml/kg/min ( $p<0.001$ ),<br>CV=6.0%                                                                                                                                                                                                                       |                                                                                                                                                                                                                    |
| Flouris et al. 2005<br>[46]       | Males = 110<br>(Healthy)                    | 21.6 ±2.5 | 20-m<br>shuttle run                                      | Gas analyzer in<br>maximal treadmill<br>test (Modified<br>Bruce protocol) | Correlation coefficient<br>(r), linear regression,<br>Bland-Altman method,<br>one-way ANOVA   | r =0.94 and $R^2=0.89$<br>( $p<0.001$ , for both),<br>SEE=1.94 ml/kg/min<br>between measured equation<br>and predicted $VO_{2max}$ .<br><br>Mean difference=0.1±0.6<br>ml/kg/min ( $p>0.05$ ) between<br>measured equation and<br>predicted $VO_{2max}$ . | The prediction model<br>increases the efficacy of the<br>20-m shuttle run test for<br>predicting $VO_{2max}$ .                                                                                                     |
| Metsios et al.<br>2008 [47]       | Males = 74<br>(Healthy)                     | 21±2      | 20-m<br>shuttle run<br><br>20-m<br>square<br>shuttle run | Gas analyzer in<br>maximal treadmill<br>test (Modified<br>Bruce protocol) | Correlation coefficient<br>(r), 95% LoA, CV, one<br>repeated measures<br>ANOVA                | Equation of 20-m shuttle run<br>test: $r=0.63$ ( $p<0.001$ ),<br>95%LoA=4.23±7.25<br>( $p<0.001$ , CV=7.37%)<br><br>Equation of 20-m square<br>shuttle run test: $r=0.95$<br>( $p<0.001$ ), 95%LoA=-<br>0.28±3.25 ( $p>0.05$ ),<br>CV=3.46%               | The 20-m square shuttle<br>run test is a valid and<br>reproducible assessment<br>tool and a more efficacious<br>test for predicting $VO_{2max}$<br>in healthy adult males<br>compared to 20-m shuttle<br>run test. |
| Kim et al. 2011<br>[48]           | Females = 155<br>Males = 158<br>(Healthy)   | 28.3±4.1  | 20-m<br>shuttle run                                      | Gas analyzer in<br>maximal treadmill<br>test (Modified<br>Bruce protocol) | Correlation coefficient<br>(r), Bland-Altman<br>method, one-way<br>repeated measures<br>ANOVA | r range from 0.86 to 0.95 (all<br>$p<0.001$ ) between 20-m<br>shuttle run test and $VO_{2max}$<br><br>Mean differences range from<br>-0.54±6.23 to -2.94±6.55 (all<br>$p<0.01$ ) between 20-m<br>shuttle run test and $VO_{2max}$ .                       | Equations based on the 20-<br>m shuttle run test result,<br>should not be applied for<br>predicting $VO_{2max}$ in<br>Korean adults.                                                                               |
| Jurio-Iriarte et al.<br>2017 [57] | Females = 75<br>Males = 181<br>(Overweight- | 53.9±8.1  | Incremental shuttle<br>walk (15-<br>level)               | Gas analyzer in<br>maximal cycle test                                     | Correlation coefficient<br>(r), linear regression, t-<br>test, Bland-Altman<br>method, SEE, E | $r=0.72$ and $R^2=0.52$<br>( $p<0.001$ , for both), SEE=<br>4.35 ml/kg/min (19% E)<br>between equation and                                                                                                                                                | Modified shuttle walk test<br>(15-level) does not<br>accurately predict $VO_{2max}$<br>in overweight/obese people                                                                                                  |

|                                |                                                                         |                |                                        |                                                                     |                                                                                                       |                                                                                                                                                                                                                                                                                                                                                           |                                                                                                                                                   |
|--------------------------------|-------------------------------------------------------------------------|----------------|----------------------------------------|---------------------------------------------------------------------|-------------------------------------------------------------------------------------------------------|-----------------------------------------------------------------------------------------------------------------------------------------------------------------------------------------------------------------------------------------------------------------------------------------------------------------------------------------------------------|---------------------------------------------------------------------------------------------------------------------------------------------------|
|                                | obese/primary hypertension)                                             |                |                                        |                                                                     |                                                                                                       | predicted $\text{VO}_{2\text{max}}$ .<br>Mean difference= $0.2 \pm 8.4$ ml/kg/min ( $p=0.48$ ) between equation and predicted $\text{VO}_{2\text{max}}$ .                                                                                                                                                                                                 | with primary hypertension.                                                                                                                        |
| Jurio-Iriarte et al. 2018 [58] | Females = 74<br>Males = 174<br>(Overweight-obese/ primary hypertension) | $54.0 \pm 7.3$ | Incremental shuttle walk (15-level)    | Gas analyzer in maximal cycle test                                  | Correlation coefficient (r), linear regression, SEE, ICC, Bland-Altman method                         | $r=0.72$ and $R^2=0.58$ ( $p<0.001$ , for both), SEE= $4.9$ ml/kg/min between measured and predicted $\text{VO}_{2\text{max}}$ .<br>ICC= $0.69$ ( $0.34-0.82$ ) between equation and predicted $\text{VO}_{2\text{max}}$ .<br>Mean difference= $3.7 \pm 9.0$ ml/kg/min, SEE= $4.35$ ml/kg/min, between equation and predicted $\text{VO}_{2\text{max}}$ . | Modified shuttle walk test (15-level) does not accurately predict $\text{VO}_{2\text{max}}$ in overweight/obese people with primary hypertension. |
| Lima et al. 2019 [61]          | Females = 54<br>(Sedentary)                                             | 18-45          | Incremental shuttle walking (15-level) | Gas analyzer in maximal treadmill test                              | Correlation coefficient (r), stepwise multiple linear regression, paired t-test, Bland-Altman method, | $r=0.57$ ( $p<0.001$ ) between $\text{VO}_{2\text{peak}}$ measured and $\text{VO}_{2\text{peak}}$ predicted.<br>$R^2=0.363$ ( $p<0.05$ ) between prediction equation and $\text{VO}_{2\text{peak}}$ measured.<br>Mean difference= $-0.14 \pm 9.27$ ml/kg/min ( $p>0.05$ ).                                                                                | Incremental shuttle walking test is valid to assess cardiorespiratory fitness in sedentary females.                                               |
| Oja et al. 1991 [24]           | Females = 80<br>Males = 79<br>(Healthy)                                 | 20-65          | 2-km walk                              | Gas analyzer in maximal treadmill test (Modified Pennsylvania State | Correlation coefficient (r), multivariate linear regression; SEE                                      | $r= -0.65$ and $-0.74$ ( $p<0.001$ , for both), between walking time $\text{VO}_{2\text{max}}$ , for male and female, respectively.                                                                                                                                                                                                                       | 2-km walk test is an accurate alternative for predicting $\text{VO}_{2\text{max}}$ in healthy adults.                                             |

|                               |                                                                                    |       |           |                                              |                                                          |                                                                                                                                                                                                                                                                                                                                                                                                                                                                        |                                                                                                                                                                                                     |
|-------------------------------|------------------------------------------------------------------------------------|-------|-----------|----------------------------------------------|----------------------------------------------------------|------------------------------------------------------------------------------------------------------------------------------------------------------------------------------------------------------------------------------------------------------------------------------------------------------------------------------------------------------------------------------------------------------------------------------------------------------------------------|-----------------------------------------------------------------------------------------------------------------------------------------------------------------------------------------------------|
|                               |                                                                                    |       |           | University<br>protocol)                      |                                                          | $R^2=0.75$ , $SEE=5.1$<br>ml/kg/min ( $p<0.05$ ) for<br>prediction model in male.<br><br>$R^2=0.73$ , $SEE=3.3$<br>ml/kg/min ( $p<0.05$ ) for<br>prediction model in female.                                                                                                                                                                                                                                                                                           |                                                                                                                                                                                                     |
| Laukkanen et al.<br>1992 [25] | Females = 32<br>Males = 36<br>(Overweight/o<br>bese)                               | 20-65 | 2-km walk | Gas analyzer in<br>maximal treadmill<br>test | Correlation coefficient<br>(r), E                        | $r = -0.49$ ( $p<0.01$ ) and $-0.72$<br>( $p<0.001$ ) between walking<br>time and $VO_{2max}$ , for male<br>and female, respectively.<br><br>$r = 0.75$ and $0.77$ ( $p<0.001$ )<br>for prediction model in male<br>and female, respectively.<br><br>$E=6.9$ ml/kg/min in male<br>and $3.2$ ml/kg/min in female.                                                                                                                                                       | 2-km walk test is valid<br>predicting $VO_{2max}$ in<br>overweight/obese<br>individuals, although<br>slightly underestimate in<br>overweight/obese men.                                             |
| Laukkanen et al.<br>1993 [27] | Females = 32<br>Males = 79<br>(Moderate<br>active and<br>highly active<br>healthy) | 35-45 | 2-km walk | Gas analyzer in<br>maximal treadmill<br>test | Correlation coefficient<br>(r), linear regression,<br>TE | $r = -0.73$ ( $p<0.05$ ), $-0.52$<br>( $p<0.05$ ), and $-0.31$<br>( $p<0.05$ ), between walking<br>time and $VO_{2max}$ , for<br>moderate active male and<br>female, and highly active<br>male, respectively.<br><br>$r=0.80$ ( $p<0.05$ ), $TE=5.7$<br>ml/kg/min for prediction<br>model in moderate active<br>male.<br><br>$r=0.55$ ( $p<0.05$ ), $TE=5.0$<br>ml/kg/min for prediction<br>model in moderate active<br>female.<br><br>$r=0.60$ ( $p<0.05$ ), $TE=7.7$ | 2-km walk test is a<br>reasonably valid field test<br>for estimating the<br>cardiorespiratory fitness of<br>healthy men and women,<br>except for people with very<br>high maximal aerobic<br>power. |

|                            |                                         |                        |             |                                        |                                                                  |                                                                                                                                                                                                                                                            |                                                                                                                    |
|----------------------------|-----------------------------------------|------------------------|-------------|----------------------------------------|------------------------------------------------------------------|------------------------------------------------------------------------------------------------------------------------------------------------------------------------------------------------------------------------------------------------------------|--------------------------------------------------------------------------------------------------------------------|
|                            |                                         |                        |             |                                        |                                                                  | ml/kg/min for prediction model in moderate active male.                                                                                                                                                                                                    |                                                                                                                    |
| Laukkanen et al. 2000 [45] | Females = 61<br>Males = 55<br>(Healthy) | 30-55                  | 2-km walk   | Gas analyzer in maximal treadmill test | Two-way ANOVA, TE                                                | Mean difference=0.9±4.4 ml/kg/min, TE=4.5 ml/kg/min in male.<br>Mean difference=2.2±3.5 ml/kg/min, TE=4.1 ml/kg/min in female.                                                                                                                             | 2-km walk test has a reasonably accuracy to predict VO <sub>2max</sub> in untrained healthy adults.                |
| Kline et al. 1987 [23]     | Females=178<br>Males=165<br>(Healthy)   | 30-69                  | 1-mile walk | Gas analyzer in maximal treadmill test | Correlation coefficient (r), multiple linear regression, SEE     | r=0.64 (p<0.05) between time test and VO <sub>2max</sub> .<br>r=0.88, SEE=5.0 l/min (p<0.05) for prediction model.                                                                                                                                         | 1-mile walk test is valid to assess VO <sub>2max</sub> in this population.                                         |
| Dolgener et al. 1994 [44]  | Females=145<br>Males=129<br>(Healthy)   | 19.3±2.32<br>19.4±3.08 | 1-mile walk | Gas analyzer in maximal treadmill test | Correlation coefficient, (r), multiple linear regression, SEE, E | r=0.69 (p<0.05), SEE=5.5 ml/kg/min, E=13.26 between Kline's equation and VO <sub>2max</sub> .<br><br>New predicted equation (l/min): r=0.86 (p<0.05), SEE=0.383, E=0.953.<br><br>New predicted equation (ml/kg/min): r=0.69 (p<0.05), SEE= 5.500, E=13.26. | 1-mile walk test over predicts VO <sub>2max</sub> in college students and should not be used with this population. |
| George et al. 1998 [29]    | Females = 59<br>Males = 39<br>(Healthy) | 18-29                  | 1-mile walk | Gas analyzer in maximal treadmill test | Correlation coefficients (r), SEE, E, paired t-test,             | Kline's equation:<br>r=0.84 (p<0.05), SEE=3.61ml/kg/min, E=6.16, overpredicted ±4.98                                                                                                                                                                       | The Dolgener's equation seems to be more accurate that Kline's equation to predict VO <sub>2max</sub> .            |

|                             |                                          |       |                              |                                        |                                                                                   |                                                                                                                                                                                                                                                                                                                                                 |                                                                                                                                                                                                          |
|-----------------------------|------------------------------------------|-------|------------------------------|----------------------------------------|-----------------------------------------------------------------------------------|-------------------------------------------------------------------------------------------------------------------------------------------------------------------------------------------------------------------------------------------------------------------------------------------------------------------------------------------------|----------------------------------------------------------------------------------------------------------------------------------------------------------------------------------------------------------|
|                             |                                          |       |                              |                                        |                                                                                   | ml/kg/min ( $p<0.05$ ).<br>Dolgener's equation:<br>$r=0.85$ ( $p<0.05$ ), $SEE=3.48$ ml/kg/min, $E=3.74$ , underestimated $\pm 1.24$ ml/kg/min ( $p<0.05$ ).                                                                                                                                                                                    |                                                                                                                                                                                                          |
| Seneli et al. 2013 [36]     | Females = 10<br>Males = 13<br>(Healthy)  | 19-44 | 1-mile walk                  | Gas analyzer in maximal treadmill test | Correlation coefficient (r), Bland-Altman method, one-way repeated measures ANOVA | $r$ range from 0.71 to 0.84 (all $p<0.05$ ) between equations and $VO_{2max}$ .<br>Mean differences range from 2.360 to 9.131 ml/kg/min (all $p<0.001$ , except for 2.360 where $p=0.064$ ).                                                                                                                                                    | Despite high correlations, Kline's and Dolgener's equations of 1-mile walk test underestimate $VO_{2max}$ . It would be beneficial if a new equation were created specifically for the curved treadmill. |
| Lunt et al. 2013 [51]       | Females = 44<br>Males = 162<br>(Healthy) | 18-39 | 1-mile walk                  | Gas analyzer in maximal treadmill test | Stepwise linear regression, SEE, one-way repeated measures ANOVA,                 | $R^2=0.68$ ( $p<0.05$ ), $SEE=4.6$ ml/kg/min, $-0.5\%$ , mean difference=1.2 ml/kg/min ( $p>0.05$ ), between new equation and $VO_{2peak}$ .                                                                                                                                                                                                    | The new equation derived from this study gave the most accurate estimate of $VO_{2peak}$ .                                                                                                               |
| Greenhalgh et al. 2001 [31] | Females = 24<br>Males = 21<br>(Healthy)  | 18-29 | 1-mile walk<br>1/4-mile walk | Gas analyzer in maximal treadmill test | Correlation coefficient (r), SEE, TE, % $\pm 4.5$ ml/kg/min                       | $r=0.81$ ( $p<0.05$ ), $SEE=4.33$ ml/kg/min, $TE=4.8$ , % 67.5 and $r=0.84$ ( $p<0.05$ ), $SEE=4.03$ ml/kg/min, $TE=4.12$ , % 75.7 between Kline's equation and 1/4-mile walk test and 1-mile walk test, respectively.<br><br>$r=0.84$ ( $p<0.05$ ), $SEE=4.03$ ml/kg/min, $TE=7.07$ , % 43.52 and $r=0.85$ ( $p<0.05$ ), $SEE=3.93$ ml/kg/min, | The 1/4-mile walk test predicts $VO_{2max}$ with similar accuracy as the 1-mile walk test.                                                                                                               |

|                             |                                         |        |                                                                        |                                        |                                                |                                                                                                                                                                                                                                                                                                                                                                                                                                                                                                     |                                                                                                                                                                                                                                   |
|-----------------------------|-----------------------------------------|--------|------------------------------------------------------------------------|----------------------------------------|------------------------------------------------|-----------------------------------------------------------------------------------------------------------------------------------------------------------------------------------------------------------------------------------------------------------------------------------------------------------------------------------------------------------------------------------------------------------------------------------------------------------------------------------------------------|-----------------------------------------------------------------------------------------------------------------------------------------------------------------------------------------------------------------------------------|
|                             |                                         |        |                                                                        |                                        |                                                | TE=47.93, % 18.9 between Dolgener's equation and 1/4-mile walk test and 1-mile walk test, respectively.                                                                                                                                                                                                                                                                                                                                                                                             |                                                                                                                                                                                                                                   |
| Larsen et al. 2002 [32]     | Female = 47<br>Male = 52<br>(Healthy)   | 18-26  | 1.5-mile run/walk                                                      | Gas analyzer in maximal treadmill test | Multiple linear regression, SEE                | R <sup>2</sup> =0.86 (p<0.05), SEE=3.37 ml/kg/min, between new equation and VO <sub>2max</sub> .                                                                                                                                                                                                                                                                                                                                                                                                    | 1.5-mile test is valid without measuring heart rate.                                                                                                                                                                              |
| McNaughton et al. 1998 [30] | Males= 32<br>(Active healthy)           | 20±0.3 | 20-m shuttle run<br>12-minute run<br>1.5-mile run<br>Treadmill jogging | Gas analyzer in maximal treadmill test | Correlation coefficient (r), SE, one-way ANOVA | r=0.82 (p<0.05), SE=1.0, mean difference=1.62 ml/kg/min (p>0.05), between 20-m shuttle run test and VO <sub>2max</sub> .<br>r=0.87 (p<0.05), SE=0.7, mean difference= -1.02 ml/kg/min (p>0.05), between 12-minute run test and VO <sub>2max</sub> .<br>r=0.87 (p<0.05), SE=1.2, mean difference=0.74 ml/kg/min (p>0.05), between 1.5-mile run and VO <sub>2max</sub> .<br>r=0.50 (p<0.05), SE=1.5, mean difference=5.58 ml/kg/min (p>0.05), between treadmill jogging test and VO <sub>2max</sub> . | The 12-minute run test is the best predictor of VO <sub>2max</sub> in young adult males with active to trained levels of fitness. The submaximal treadmill jogging test has low-moderate validity to predict VO <sub>2max</sub> . |
| George et al. 1993 [28]     | Females = 45<br>Males = 84<br>(Healthy- | 18-29  | Submaximal single-stage treadmill                                      | Gas analyzer in maximal treadmill test | Multiple linear regression, SEE                | r=0.84, (p<0.001), SEE=3.2 ml/kg/min between prediction equation and                                                                                                                                                                                                                                                                                                                                                                                                                                | Submaximal single-stage treadmill jogging test is valid for estimating VO <sub>2max</sub> .                                                                                                                                       |



|                                       |                                       |       |                                                  |                                                              |                                                                                       |                                                                                                                                                                                                                                                                                                                                                                                                   |                                                                                                                     |
|---------------------------------------|---------------------------------------|-------|--------------------------------------------------|--------------------------------------------------------------|---------------------------------------------------------------------------------------|---------------------------------------------------------------------------------------------------------------------------------------------------------------------------------------------------------------------------------------------------------------------------------------------------------------------------------------------------------------------------------------------------|---------------------------------------------------------------------------------------------------------------------|
|                                       | active)                               |       | jogging                                          |                                                              |                                                                                       | VO <sub>2max</sub> .                                                                                                                                                                                                                                                                                                                                                                              |                                                                                                                     |
| Cao et al. 2013 [50]                  | Females=140<br>Males=143<br>(Healthy) | 20-69 | 3-minute walk                                    | Gas analyzer in maximal cycle test                           | Multiple linear regression, SEE, %SEE                                                 | r =0.55 (p<0.001) between time of 3-minute walk test and VO <sub>2max</sub> .<br><br>Best equation %Fat: R <sup>2</sup> =0.70 (p<0.001), SEE=4.565 ml/kg/min, % SEE=13.316.                                                                                                                                                                                                                       | The 3-minute walk test is a valid tool for estimating VO <sub>2max</sub> in Japanese adult men and women.           |
| Di Thommazo-Luporini et al. 2015 [53] | Females=51<br>(Sedentary obese)       | 20-45 | 6-minute walk<br><br>Incremental shuttle walking | Gas analyzer in maximal treadmill test (Bruce protocol)      | Correlation coefficient (r), linear regression, Bland-Altman method                   | r=0.70 and 0.62 (all p<0.001) between VO <sub>2max</sub> and 6-minute walk and incremental shuttle walking tests<br><br>There was agreement between Bruce protocol and both the incremental shuttle walking test: VO <sub>2max</sub> =6.1 (CI: 4.9–7.3), and heart rate=36.2 (CI: 32.1–40.3); and 6-minute walk test: VO <sub>2max</sub> =6.9 (CI: 5.7–8.1), and heart rate=37.0 (CI: 33.3–40.7). | 6-minute walk and incremental shuttle walking tests are valid to assess cardiorespiratory fitness in obese females. |
| Di Thommazo-Luporini et al. 2016 [54] | Females=56<br>(Sedentary obese)       | 35±7  | 6-minute walk                                    | Gas analyzer in maximal treadmill test (Bruce protocol test) | Correlation coefficient (r), stepwise multiple linear regression, Bland-Altman method | r=0.56 (p<0.001) between VO <sub>2max</sub> and up and down step cycles 6-minute walk.<br><br>Mean difference: 5.1±3.6 ml/kg/min.                                                                                                                                                                                                                                                                 | 6-minute walk test is valid to assess cardiorespiratory fitness in obese females.                                   |
| Manttari et al. 2018 [40]             | Females = 36<br>Males = 39            | 19-75 | 6-minute walk                                    | Gas analyzer in maximal treadmill test                       | Linear regression, SEE, Bland-Altman method                                           | R <sup>2</sup> =0.85(p<0.001) and SEE=3.9 ml/kg/min, between prediction equation                                                                                                                                                                                                                                                                                                                  | 6-minute walk test is an accurate and valid tool for estimating VO <sub>2max</sub> .                                |

|                            |                                         |       |                                           |                                        |                                                                       |                                                                                                                                                                                                                                                                                                                                                                                     |                                                                                                                       |
|----------------------------|-----------------------------------------|-------|-------------------------------------------|----------------------------------------|-----------------------------------------------------------------------|-------------------------------------------------------------------------------------------------------------------------------------------------------------------------------------------------------------------------------------------------------------------------------------------------------------------------------------------------------------------------------------|-----------------------------------------------------------------------------------------------------------------------|
|                            | (Healthy)                               |       |                                           | Douglas bag methods                    |                                                                       | and $VO_{2max}$ , in male.<br>$R^2=0.90$ ( $p<0.001$ ) and $SEE=3.1$ ml/kg/min, between prediction equation and $VO_{2max}$ , in female.<br>Mean difference: $0\pm5.4$ ml/kg/min.                                                                                                                                                                                                   |                                                                                                                       |
| Jamnack et al. 2016 [56]   | Females = 26<br>Males = 31<br>(Healthy) | 18-39 | YMCA cycle<br>Mankato submaximal exercise | Gas analyzer in maximal treadmill test | Linear regression, ICC, SEE, TE, CV, one-way repeated measures ANOVA, | $r=0.646$ ( $p<0.05$ ), $ICC=0.271$ , $SEE=6.91$ ml/kg/min, $TE=5.57$ , $CV=15.17\%$ , mean difference= $3.96$ ml/kg/min ( $p<0.01$ ), between YMCA test and $VO_{2max}$ .<br><br>$r=0.72$ ( $p<0.05$ ), $ICC=0.722$ , $SEE=6.20$ ml/kg/min, $TE=4.62$ , $CV=11.28\%$ , mean difference= $-1.54$ ml/kg/min ( $p>0.05$ ), between Mankato submaximal exercise test and $VO_{2max}$ . | The Mankato submaximal exercise test yield better estimates of $VO_{2max}$ . The YMCA test underestimates $VO_{2max}$ |
| Siconolfi et al. 1982 [22] | Females = 28<br>Males = 35<br>(Healthy) | 20-70 | Modified Astrand-Ryhming                  | Gas analyzer in maximal cycle test     | Linear regression, SEE, paired t-test                                 | $r=0.86$ ( $p<0.05$ ), $SEE=0.359$ l/min, mean difference= $0.07$ ml/kg/min ( $p>0.05$ ), between prediction equation and $VO_{2max}$ in males.<br><br>$r=0.97$ ( $p<0.05$ ), $SEE=0.199$ l/min, mean difference= $-0.04$ ml/kg/min ( $p>0.05$ ), between prediction equation and $VO_{2max}$ in females.                                                                           | Modified Astrand-Ryhming test is valid for estimating $VO_{2max}$ .                                                   |

|                                            |                                         |       |                                          |                                                     |                                                                                                           |                                                                                                                                                                                                                                                                                                                                                                          |                                                                             |
|--------------------------------------------|-----------------------------------------|-------|------------------------------------------|-----------------------------------------------------|-----------------------------------------------------------------------------------------------------------|--------------------------------------------------------------------------------------------------------------------------------------------------------------------------------------------------------------------------------------------------------------------------------------------------------------------------------------------------------------------------|-----------------------------------------------------------------------------|
| Bonet et al. 2020<br>[42]                  | Females = 42<br>(Healthy-active)        | 35-45 | The University Montreal track (UM-track) | Gas analyzer in treadmill performing UM-track test  | Correlation coefficient (r), linear regression, paired t-test, Cohen's d effect size, Bland-Altman method | <p><math>r = 0.93</math> (<math>p &lt; 0.001</math>) between time in UM-track test and UM-treadmill test.</p> <p><math>r = 0.71</math> (<math>p &lt; 0.001</math>) between time in UM-track test and <math>VO_{2max}</math>.</p> <p>Mean difference = <math>0.025 \pm 7.445</math> ml/kg/min (<math>p &gt; 0.05</math>), Cohen's d <math>&lt; 0.5</math>.</p>            | UM-track test valid for estimating $VO_{2max}$ in middle-aged active women. |
| Guo et al. 2018<br>[39]                    | Females = 22<br>Males = 18<br>(Healthy) | 18-64 | Ruffier                                  | Gas analyzer in treadmill (modified Balke protocol) | Multiple linear regression, RMSE, sensitivity and specificity, kappa                                      | <p><math>R^2 = 0.637</math> (<math>p &lt; 0.05</math>), RMSE = 0.517, sensitivity = 0.79 and specificity = 0.56, <math>k = 0.60</math> between prediction equation and <math>VO_{2max}</math>.</p>                                                                                                                                                                       | Ruffier test has moderate validity for estimating $VO_{2max}$ .             |
| <i>Musculoskeletal fitness (isometric)</i> |                                         |       |                                          |                                                     |                                                                                                           |                                                                                                                                                                                                                                                                                                                                                                          |                                                                             |
| Shechtman et al. 2005 [97]                 | Females = 50<br>Males = 50<br>(Healthy) | 20-40 | DynEx dynamometer                        | Known weights<br>Jamar dynamometer                  | Correlation coefficient (r), measurement error (%), repeated measures ANCOVA                              | <p><math>r = 0.99</math> (<math>p &lt; 0.05</math>) between DynEx and Jamar dynamometers.</p> <p>Average measurement error = 1.63% and 7.74% for DynEx and Jamar dynamometer, respectively, in relation known weights.</p> <p>Significant differences in grip strength scores between DynEx and Jamar dynamometers (<math>F = 6.222</math>, <math>p = 0.014</math>).</p> | The DynEx dynamometer is valid for assessing grip strength.                 |

|                                            |                                            |                |                                                    |                  |                                               |                                                                                                                                                                                                                               |                                                                              |
|--------------------------------------------|--------------------------------------------|----------------|----------------------------------------------------|------------------|-----------------------------------------------|-------------------------------------------------------------------------------------------------------------------------------------------------------------------------------------------------------------------------------|------------------------------------------------------------------------------|
| España-Romero et al. 2010 [102]            | NA                                         | NA             | TKK, DynEx and Jamar dynamometers                  | Known weights    | Bland-Altman method                           | Negative systematic error for the Jamar and DynEx dynamometer ( $-1.92 \pm 1.92$ and $-1.43 \pm 3.56$ kg, respectively, ( $p < 0.05$ )). Positive systematic bias for the TKK dynamometer ( $0.49 \pm 1.32$ kg, $p < 0.05$ ). | TKK dynamometer is the most appropriate dynamometer to assess grip strength. |
| Cadenas-Sánchez et al. 2016 [103]          | NA                                         | NA             | TKK dynamometers (old and new digitals and analog) | Known weights    | One-sample t-test, Bland-Altman method        | Negative systematic error for the new digital ( $-2.64$ to $-2.02$ kg), new analogic ( $-2.15$ kg to $-1.51$ kg), old digital and analogic ( $-0.94$ kg and $-2.29$ kg, respectively). All $p < 0.001$ .                      | TKK dynamometer is valid to assess grip strength.                            |
| Kolimechikov et al. 2020 [104]             | NA                                         | NA             | TKK and DynEx and dynamometers                     | Known weights    | Paired t-test, Bland-Altman method            | Non-significant systematic error of $-0.20 \pm 0.62$ kg ( $p > 0.05$ ) for the TKK, and a significant systemic error of $-0.42 \pm 0.46$ kg ( $p < 0.001$ ) for the DynEX dynamometer.                                        | TKK dynamometer showed to be more valid than DynEX dynamometer.              |
| <i>Musculoskeletal fitness (endurance)</i> |                                            |                |                                                    |                  |                                               |                                                                                                                                                                                                                               |                                                                              |
| Mannion et al. 1994 [95]                   | Female = 208<br>Male = 21<br><br>(Healthy) | $26.9 \pm 4.2$ | Biering-Sørensen                                   | Electromyography | Linear regression                             | $R^2 = 0.69$ ( $p = 0.001$ ), between time endurance and changes in median frequency                                                                                                                                          | The Biering-Sørensen test is valid for measuring back muscle fatigue.        |
| Kankaanpää et al. 1998 [96]                | Female = 153                               | $38.9 \pm 7.6$ | Biering-                                           | Electromyography | Correlation coefficients (r), multiple linear | r ranges from 0.60 to 0.71 ( $p < 0.05$ ), between $NMF_{slope}$                                                                                                                                                              | The validity of this test to assess lumbar muscle                            |

|                              |                                                      |                           |                  |                  |                                                                                                     |                                                                                                                                                                                                                                                                                                                                                                |                                                                       |
|------------------------------|------------------------------------------------------|---------------------------|------------------|------------------|-----------------------------------------------------------------------------------------------------|----------------------------------------------------------------------------------------------------------------------------------------------------------------------------------------------------------------------------------------------------------------------------------------------------------------------------------------------------------------|-----------------------------------------------------------------------|
|                              | Male = 100<br><br>(Healthy)                          |                           | Sørensen         |                  | regression                                                                                          | and the endurance time.                                                                                                                                                                                                                                                                                                                                        | endurance is acceptable.                                              |
|                              |                                                      |                           |                  |                  |                                                                                                     | BMI contributed most of the variance in women: $R^2=0.29$ ( $p<0.001$ ) and BMI and age in men: $R^2=0.12$ ( $p<0.05$ ).                                                                                                                                                                                                                                       |                                                                       |
| Coorevits et al. 2008 [98]   | Female = 13<br><br>Male = 7<br><br>(Healthy-active)  | 23.5±1.1<br><br>32.9±14.3 | Biering-Sørensen | Electromyography | Correlation coefficients (r), multiple stepwise linear regression, two-way ANOVA                    | r ranges from 0.46 to 0.71 ( $p<0.05$ ), between NMF <sub>slope</sub> and the endurance time.<br><br>The most predictive muscle was iliocostalis lumborum pars thoracis: $R^2=0.477$ ( $p<0.001$ ).<br><br>Difference between both methods to estimated end point test ( $\pm 16$ sec., $p=0.22$ ); but highly correlated: r ranges 0.94 to 0.98 ( $p<0.01$ ). | The Biering-Sørensen test is valid for measuring back muscle fatigue. |
| De Blaiser et al. 2018 [100] | Female = 15<br><br>Male = 14<br><br>(Healthy-active) | 25.5±2.1                  | Prone bridging   | Electromyography | Correlation coefficients (r), multiple backward linear regression, one-way repeated measures ANOVA, | r=0.59 ( $p<0.01$ ) between NMF <sub>slope</sub> and the endurance time.<br><br>Endurance time is the best predictor: $R^2=0.261$ ( $p<0.05$ ).<br><br>NMF <sub>slope</sub> values showed non-significant differences between the different muscles ( $p>0.05$ ).                                                                                              | The prone bridging test is valid for evaluating core muscle fatigue.  |

*Musculoskeletal fitness (explosive)*

|                         |                                     |       |                 |                               |                                                                           |                                                                                                                                                                                                                                                                                                                                                                                                  |                                                                                                                    |
|-------------------------|-------------------------------------|-------|-----------------|-------------------------------|---------------------------------------------------------------------------|--------------------------------------------------------------------------------------------------------------------------------------------------------------------------------------------------------------------------------------------------------------------------------------------------------------------------------------------------------------------------------------------------|--------------------------------------------------------------------------------------------------------------------|
| Bui et al. 2015<br>[99] | Females=18<br>Males=23<br>(Healthy) | 19-40 | Sargent<br>jump | Contact mat<br>Optical system | Linear regression,<br>repeated measures<br>ANOVA, Bland-<br>Altman method | <p><math>R^2=0.8</math> (<math>p&lt;0.05</math>) between contact mat and Sargent jump.</p> <p><math>R^2=0.76</math> (<math>p&lt;0.05</math>) between optical sensor and Sargent jump.</p> <p>Positive systematic error=<math>4.4\pm 5.1</math> and <math>4.8\pm 5.7</math> cm (<math>p&lt;0.001</math> for both) between the Sargent jump with contact mat and optical sensor, respectively.</p> | Sargent jump test overestimates the height of a vertical jump and its accuracy is reduced as jump height increase. |
|-------------------------|-------------------------------------|-------|-----------------|-------------------------------|---------------------------------------------------------------------------|--------------------------------------------------------------------------------------------------------------------------------------------------------------------------------------------------------------------------------------------------------------------------------------------------------------------------------------------------------------------------------------------------|--------------------------------------------------------------------------------------------------------------------|

*Musculoskeletal fitness (flexibility)*

|                             |                                                      |       |                                               |                               |                                                                                  |                                                                                                                                                                                                                                                                                                                                                                                                                                                                                                                  |                                                             |
|-----------------------------|------------------------------------------------------|-------|-----------------------------------------------|-------------------------------|----------------------------------------------------------------------------------|------------------------------------------------------------------------------------------------------------------------------------------------------------------------------------------------------------------------------------------------------------------------------------------------------------------------------------------------------------------------------------------------------------------------------------------------------------------------------------------------------------------|-------------------------------------------------------------|
| Kawano et al.<br>2010 [101] | Females = 100<br>Males = 100<br>(Healthy-<br>active) | 18-25 | Sit-and-<br>reach<br><br>(Hip joint<br>angle) | Angular kinematic<br>analysis | Correlation coefficient<br>( $r$ ), one-way repeated<br>measures ANOVA,<br>95%CI | <p><math>r=0.48</math> (<math>p&lt;0.05</math>) between sit-and- reach and kinematic analysis with ankle dorsiflexed.</p> <p><math>r=0.44</math> (<math>p&lt;0.05</math>) between sit-and- reach and kinematic analysis with ankle plantarflexed.</p> <p>The hip joint angle values for men presented significant statistical differences when comparing dorsiflexed (<math>=83.0^\circ</math>) with plantarflexed (<math>87.3^\circ</math>), 95% CI of mean difference (3.6-4.9; <math>p&lt;0.0001</math>).</p> | Sit-and- reach test is not valid to assess hip joint angle. |
|-----------------------------|------------------------------------------------------|-------|-----------------------------------------------|-------------------------------|----------------------------------------------------------------------------------|------------------------------------------------------------------------------------------------------------------------------------------------------------------------------------------------------------------------------------------------------------------------------------------------------------------------------------------------------------------------------------------------------------------------------------------------------------------------------------------------------------------|-------------------------------------------------------------|

These were similar to those  
found for women  
(dorsiflexed =107.9°;  
plantarflexed =112.9°), 95%  
CI of mean difference (3.5-  
4.9;  $p<0.001$ ).

---

ANOVA indicates analysis of variance; ANCOVA, analysis of covariance; BMI, body mass index; CI, coefficient of interval; CV, coefficient of variation; E, error; ICC, intraclass correlation coefficient; MANOVA, multiple analysis of variance;  $NMF_{\text{slope}}$ , normalized median frequency slope; RM, repetition maximum; RMSE, root mean square error; SEE, standard error estimate; TE, total error;  $VO_{2\text{max}}$ , maximum oxygen uptake;  $VO_{2\text{peak}}$ , peak oxygen uptake.

## REFERENCES

1. Mayorga-Vega, D.; Merino-Marban, R.; Viciano, J., Criterion-related validity of sit-and-reach tests for estimating hamstring and lumbar extensibility: a meta-analysis. *Journal of Sports Science & Medicine* **2014**, *13* (1), 1-14.
2. Mayorga-Vega, D.; Viciano, J.; Cocca, A.; Merino-Marban, R., Criterion-related validity of toe-touch test for estimating hamstring extensibility: A metaanalysis. *J Hum Sport Exerc* **2014**, *9* (1), 188-200.
3. Bennett, H.; Parfitt, G.; Davison, K.; Eston, R., Validity of submaximal step tests to estimate maximal oxygen uptake in healthy adults. *Sports Medicine* **2016**, *46* (5), 737-750.
4. Mayorga-Vega, D.; Aguilar-Soto, P.; Viciano, J., Criterion-related validity of the 20-m shuttle run test for estimating cardiorespiratory fitness: a meta-analysis. *Journal of Sports Science & Medicine* **2015**, *14* (3), 536-547.
5. Mayorga-Vega, D.; Bocanegra-Parrilla, R.; Ornelas, M.; Viciano, J., Criterion-related validity of the distance- and time-based walk/run field tests for estimating cardiorespiratory fitness: a systematic review and Meta-analysis. *PloS One* **2016**, *11* (3), e0151671-e0151671.
6. Leger, L.; Boucher, R., An indirect continuous running multistage field test: the Universite de Montreal track test. *Can. J. Appl. Sport. Sci* **1980**, *5*, 77-84.
7. Santa Maria, D.; Kinnear, G. R.; Kearney, J. T.; Martin, T. P., The objectivity, reliability, and validity of the OSU step test for college males. *Research Quarterly* **1976**, *47* (3), 445-452.
8. Siconolfi, S. F.; Garber, C. E.; Lasater, T. M.; Carleton, R. A., A simple, valid step test for estimating maximal oxygen uptake in epidemiologic studies. *American Journal of Epidemiology* **1985**, *121* (3), 382-390.
9. Ritchie, C.; Trost, S. G.; Brown, W.; Armit, C., Reliability and validity of physical fitness field tests for adults aged 55 to 70 years. *Journal of Science and Medicine in Sport* **2005**, *8* (1), 61-70.
10. Azmi, S. H.; Sulaiman, N., Validity of selected cardiovascular field-based test among Malaysian healthy female adult. *J Fundam Appl Sci* **2017**, *9*, 1227-1235.
11. McGawley, K., The Reliability and Validity of a Four-Minute Running Time-Trial in Assessing VO<sub>2</sub>max and Performance. *Frontiers in Physiology* **2017**, *8*, 270.
12. Giacomantonio, N.; Morrison, P.; Rasmussen, R.; MacKay-Lyons, M. J., Reliability and validity of the 6-minutestep test for clinical assessment of cardiorespiratory fitness in people at risk of cardiovascular disease. *Journal of Strength and Conditioning Research* **2020**, *34* (5), 1376-1382.
13. Leger, L. A.; Mercier, D.; Gadoury, C.; Lambert, J., The multistage 20 metre shuttle run test for aerobic fitness. *JOURNAL OF SPORTS SCIENCES* **1988**, *6* (2), 93-101.



14. Flouris, A. D.; Metsios, G. S.; Famisis, K.; Geladas, N.; Koutedakis, Y., Prediction of VO<sub>2</sub>max from a new field test based on portable indirect calorimetry. *J Sci Med Spor* **2010**, *13* (1), 70-73.
15. Gabriel, K. K. P.; Rankin, R. L.; Lee, C.; Charlton, M. E.; Swan, P. D.; Ainsworth, B. E.; Pettee Gabriel, K. K.; Rankin, R. L.; Lee, C.; Charlton, M. E.; Swan, P. D.; Ainsworth, B. E., Test-retest reliability and validity of the 400-meter walk test in healthy, middle-aged women. *J Phys Act Health* **2010**, *7* (5), 649-657.
16. Hansen, D.; Jacobs, N.; Bex, S.; D'Haene, G.; Dendale, P.; Claes, N., Are fixed-rate step tests medically safe for assessing physical fitness? *European Journal of Applied Physiology* **2011**, *111* (10), 2593-2599.
17. Burr, J. F.; Bredin, S. S.; Faktor, M. D.; Warburton, D. E., The 6-minute walk test as a predictor of objectively measured aerobic fitness in healthy working-aged adults. *Physician and Sportsmedicine* **2011**, *39* (2), 133-9.
18. Mikawa, K.; Senjyu, H., Development of a field test for evaluating aerobic fitness in middle-aged adults: Validity of a 15-m Incremental Shuttle Walk and Run Test. *Journal of Sports Science & Medicine* **2011**, *10* (4), 712-717.
19. Arcuri, J. F.; Borghi-Silva, A.; Labadessa, I. G.; Sentanin, A. C.; Candolo, C.; Pires Di Lorenzo, V. A., Validity and reliability of the 6-minute step test in healthy individuals: a cross-sectional study. *Clinical Journal of Sport Medicine* **2016**, *26* (1), 69-75.
20. Jurgensen, S. P.; Trimer, R.; Dourado, V. Z.; Di Thommazo-Luporini, L.; Bonjorno-Junior, J. C.; Oliveira, C. R.; Arena, R.; Mendes, R. G.; Borghi-Silva, A., Shuttle walking test in obese women: test-retest reliability and concurrent validity with peak oxygen uptake. *Clinical Physiology and Functional Imaging* **2015**, *35* (2), 120-126.
21. Lerche, L.; Olsen, A.; Petersen, K. E. N.; Rostgaard-Hansen, A. L.; Dragsted, L. O.; Nordsborg, N. B.; Tjonneland, A.; Halkjaer, J., Validity of physical activity and cardiorespiratory fitness in the Danish cohort "Diet, Cancer and Health-Next Generations". *Scandinavian Journal of Medicine & Science in Sports* **2017**, *27* (12), 1864-1872.
22. Siconolfi, S. F.; Cullinane, E. M.; Carleton, R. A.; Thompson, P. D., Assessing VO<sub>2</sub>max in epidemiologic studies: modification of the Astrand-Rhyming test. *Medicine and Science in Sports and Exercise* **1982**, *14* (5), 335-338.
23. Kline, C.; Porcari, J. P.; Hintermeister, R.; Freedson, P. S.; Ward, A.; McCarron, R. F.; Ross, J.; Rippe, J., Estimation of from a one-mile track walk, gender, age and body weight. *Med. Sports Exerc* **1987**, *19*, 253-259.
24. Oja, P.; Laukkanen, R.; Pasanen, M.; Tyry, T.; Vuori, I., A 2-km walking test for assessing the cardiorespiratory fitness of healthy adults. *Int J Sports Med* **1991**, *12* (4), 356-62.
25. Laukkanen, R.; Oja, P.; Pasanen, M.; Vuori, I., Validity of a two kilometre walking test for estimating maximal aerobic power in overweight adults. *Int J Obes Relat Metab Disord* **1992**, *16* (4), 263-8.
26. Weller, I. M.; Thomas, S. G.; Cox, M. H.; Corey, P. N., A study to validate the Canadian Aerobic Fitness Test. *Can J Public Health* **1992**, *83* (2), 120-4.

27. Laukkanen, R. M. T.; Oja, P.; Pasanen, M. E.; Vuori, I. M., Criterion validity of a two-kilometer walking test for predicting the maximal oxygen uptake of moderately to highly active middle-aged adults. *Scandinavian Journal of Medicine and Science in Sports* **1993**, (3), 267-272.
28. George, J. D.; Vehrs, P. R.; Allsen, P. E.; Fellingham, G. W.; Fisher, A. G., Development of a submaximal treadmill jogging test for fit college-aged individuals. *Medicine and Science in Sports and Exercise* **1993**, 25 (5), 643-647.
29. George, J. D.; Fellingham, G. W.; Fisher, A. G., A modified version of the Rockport Fitness Walking Test for college men and women. *Research Quarterly for Exercise and Sport* **1998**, 69 (2), 205-209.
30. McNaughton, L.; Hall, P.; Cooley, D., Validation of several methods of estimating maximal oxygen uptake in young men. *Perceptual and Motor Skills* **1998**, 87 (2), 575-584.
31. Greenhalgh, H. A.; George, J. D.; Hager, R. L., Cross-validation of a quarter-mile walk test using two VO<sub>2</sub> max regression models. *Meas Phys Educ Exerc Sci* **2001**, 5 (3), 139-151.
32. Larsen, G. E.; George, J. D.; Alexander, J. L.; Fellingham, G. W.; Aldana, S. G.; Parcell, A. C., Prediction of maximum oxygen consumption from walking, jogging, or running. *Research Quarterly for Exercise and Sport* **2002**, 73 (1), 66-72.
33. Flouris, A. D.; Koutedakis, Y.; Nevill, A.; Metsios, G. S.; Tsiotra, G.; Parasiris, Y., Enhancing specificity in proxy-design for the assessment of bioenergetics. *Journal of Science and Medicine in Sport* **2004**, 7 (2), 197-204.
34. Cooper, S. M.; Baker, J. S.; Tong, R. J.; Roberts, E.; Hanford, M., The repeatability and criterion related validity of the 20 m multistage fitness test as a predictor of maximal oxygen uptake in active young men. *Br J Sports Med* **2005**, 39 (4), e19.
35. Kumar, S. K.; Khare, P.; Jaryal, A. K.; Talwar, A., Validity of heart rate based nomogram for estimation of maximum oxygen uptake in Indian population. *Indian Journal of Physiology and Pharmacology* **2012**, 56 (3), 279-283.
36. Seneli, R. M.; Ebersole, K. T.; O'Connor, K. M.; Snyder, A. C., Estimated VO<sub>2</sub>max from the Rockport Walk Test on a Nonmotorized Curved Treadmill. *Journal of Strength and Conditioning Research* **2013**, 27 (12), 3495-3505.
37. Carvalho, L. P.; Di Thommazo-Luporini, L.; Aubertin-Leheudre, M.; Bonjorno Junior, J. C.; de Oliveira, C. R.; Luporini, R. L.; Mendes, R. G.; Lopes Zangrando, K. T.; Trimer, R.; Arena, R.; Borghi-Silva, A., Prediction of cardiorespiratory fitness by the six-minute step test and its association with muscle strength and power in sedentary obese and lean young women: a cross-sectional study. *PloS One* **2015**, 10 (12), e0145960.
38. Teren, A.; Zachariae, S.; Beutner, F.; Ubrich, R.; Sandri, M.; Engel, C.; Loeffler, M.; Gielen, S., Incremental value of veterans specific activity questionnaire and the ymca-step test for the assessment of cardiorespiratory fitness in population-based studies. *Eur J Prev Cardiol* **2016**, 23 (11), 1221-1227.
39. Guo, Y.; Bian, J.; Li, Q.; Leavitt, T.; Rosenberg, E. I.; Buford, T. W.; Smith, M. D.; Vincent, H. K.; Modave, F., A 3-minute test of cardiorespiratory fitness for use in primary care clinics. *PloS One* **2018**, 13 (7), e0201598.

40. Manttari, A.; Suni, J.; Sievanen, H.; Husu, P.; Vaha-Ypya, H.; Valkeinen, H.; Tokola, K.; Vasankari, T., Six-minute walk test: a tool for predicting maximal aerobic power (VO<sub>2</sub> max) in healthy adults. *Clinical Physiology and Functional Imaging* **2018**.
41. Ricci, P. A.; Cabiddu, R.; Jürgensen, S. P.; André, L. D.; Oliveira, C. R.; Di Thommazo-Luporini, L.; Ortega, F. P.; Borghi-Silva, A., Validation of the two-minute step test in obese with comorbidities and morbidly obese patients. *Brazilian Journal of Medical and Biological Research* **2019**, 52 (9), e8402.
42. Bonet, J. B.; Magalhaes, J.; Viscor, G.; Pages, T.; Javierre, C. F.; Torrella, J. R., A field tool for the aerobic power evaluation of middle-aged female recreational runners. *Women and Health* **2020**.
43. Kieu, N. T. V.; Jung, S. J.; Shin, S. W.; Jung, H. W.; Jung, E. S.; Won, Y. H.; Kim, Y. G.; Chae, S. W., The validity of the YMCA 3-minute step test for estimating maximal oxygen uptake in healthy Korean and Vietnamese adults. *J Lifestyle Med* **2020**, 10 (1), 21-29.
44. Dolgener, F. A.; Hensley, L. D.; Marsh, J. J.; Fjelstul, J. K., Validation of the Rockport Fitness Walking Test in college males and females. *Research Quarterly for Exercise and Sport* **1994**, 65 (2), 152-158.
45. Laukkanen, R. M. T.; Kukkonen-Harjula, T. K.; Oja, P.; Pasanen, M. E.; Vuori, I. M., Prediction of change in maximal aerobic power by the 2-km walk test after walking training in middle-aged adults. *International Journal of Sports Medicine* **2000**, 21 (2), 113-116.
46. Flouris, A. D.; Metsios, G. S.; Koutedakis, Y., Enhancing the efficacy of the 20 m multistage shuttle run test. *British Journal of Sports Medicine* **2005**, 39 (3), 166-170.
47. Metsios, G. S.; Flouris, A. D.; Koutedakis, Y.; Nevill, A., Criterion-related validity and test-retest reliability of the 20m square shuttle test. *Journal of Science and Medicine in Sport* **2008**, 11 (2), 214-217.
48. Kim, J.; Jung, S. H.; Cho, H. C., Validity and Reliability of Shuttle-Run Test in Korean Adults. *International Journal of Sports Medicine* **2011**, 32 (8), 580-585.
49. Aadahl, M.; Zacho, M.; Linneberg, A.; Thuesen, B. H.; Jorgensen, T., Comparison of the Danish step test and the watt-max test for estimation of maximal oxygen uptake: the Health2008 study. *Eur J Prev Cardiol* **2013**, 20 (6), 1088-1094.
50. Cao, Z.-B.; Miyatake, N.; Aoyama, T.; Higuchi, M.; Tabata, I., Prediction of maximal oxygen uptake from a 3-minute walk based on gender, age, and body composition. *J Phys Act Health* **2013**, 10 (2), 280-287.
51. Lunt, H.; Roiz De Sa, D.; Roiz De Sa, J.; Allsopp, A., Validation of one-mile walk equations for the estimation of aerobic fitness in British military personnel under the age of 40 years. *Military Medicine* **2013**, 178 (7), 753-759.
52. Beutner, F.; Ubrich, R.; Zachariae, S.; Engel, C.; Sandri, M.; Teren, A.; Gielen, S., Validation of a brief step-test protocol for estimation of peak oxygen uptake. *Eur J Prev Cardiol* **2015**, 22 (4), 503-512.

53. Di Thommazo-Luporini, L.; Pinheiro Carvalho, L.; Luporini, R.; Trimer, R.; Falasco Pantoni, C. B.; Catai, A. M.; Arena, R.; Borghi-Silva, A., The six-minute step test as a predictor of cardiorespiratory fitness in obese women. *European Journal of Physical and Rehabilitation Medicine* **2015**, *51* (6), 793-802.
54. Di Thommazo-Luporini, L.; Carvalho, L. P.; Luporini, R. L.; Trimer, R.; Falasco Pantoni, C. B.; Martinez, A. F.; Catai, A. M.; Arena, R.; Borghi-Silva, A., Are cardiovascular and metabolic responses to field walking tests interchangeable and obesity-dependent? *Disability and Rehabilitation* **2016**, *38* (18), 1820-1829.
55. Hansen, D.; Jacobs, N.; Thijs, H.; Dendale, P.; Claes, N., Validation of a single-stage fixed-rate step test for the prediction of maximal oxygen uptake in healthy adults. *Clinical Physiology and Functional Imaging* **2016**, *36* (5), 401-406.
56. Jamnick, N. A.; By, S.; Pettitt, C. D.; Pettitt, R. W., Comparison of the YMCA and a custom submaximal exercise test for determining Vo2max. *Medicine and Science in Sports and Exercise* **2016**, *48* (2), 254-259.
57. Jurio-Iriarte, B.; Gorostegi-Anduaga, I.; Rodrigo Aispuru, G.; Perez-Asenjo, J.; Brubaker, P. H.; Maldonado-Martin, S., Association between Modified Shuttle Walk Test and cardiorespiratory fitness in overweight/obese adults with primary hypertension: EXERDIET-HTA study. *Journal of the American Society of Hypertension* **2017**, *11* (4), 186-195.
58. Jurio-Iriarte, B.; Brubaker, P. H.; Gorostegi-Anduaga, I.; Corres, P.; Martinez Aguirre-Betolaza, A.; Maldonado-Martin, S., Validity of the modified shuttle walk test to assess cardiorespiratory fitness after exercise intervention in overweight/obese adults with primary hypertension. *Clinical and Experimental Hypertension* **2018**, 1-6.
59. Hong, S. H.; Yang, H. I.; Kim, D. I.; Gonzales, T. I.; Brage, S.; Jeon, J. Y., Validation of submaximal step tests and the 6-min walk test for predicting maximal oxygen consumption in young and healthy participants. *International Journal of Environmental Research and Public Health* **2019**, *16* (23).
60. Lee, O.; Lee, S.; Kang, M.; Mun, J.; Chung, J., Prediction of maximal oxygen consumption using the Young Men's Christian Association-step test in Korean adults. *European Journal of Applied Physiology* **2019**, *119* (5), 1245-1252.
61. Lima, L. P.; Leite, H. R.; Matos, M. A.; Neves, C. D. C.; Lage, V.; Silva, G. P. D.; Lopes, G. S.; Chaves, M. G. A.; Santos, J. N. V.; Camargos, A. C. R.; Figueiredo, P. H. S.; Lacerda, A. C. R.; Mendonça, V. A., Cardiorespiratory fitness assessment and prediction of peak oxygen consumption by Incremental Shuttle Walking Test in healthy women. *PloS One* **2019**, *14* (2), e0211327.
62. Berger, R., Evaluation of the 2-minute sit-up test as a measure of muscular endurance and strength. *Journal of the Association for Physical and Mental Rehabilitation* **1966**, *20* (4), 140.
63. Wells, K. F.; Dillon, E. K., The sit-and-reach. A test of back and leg flexibility. *Research Quarterly for Exercise and Sport* **1952**, *23*, 115-118.
64. DeWitt, R., A study of the sit-up Type of test as a means of measuring strength and endurance of the abdominal muscles. *Research Quarterly* **1944**, *15* (1), 60-63.

65. Mathews, D. K.; Shaw, V.; Bohnen, M., Hip flexibility of college women as related to length of body segments. *Research Quarterly* **1957**, 28 (4), 352-356.
66. Harvey, V. P.; Scott, G. D., An investigation of the curl-down test as a measure of abdominal strength. *Research Quarterly* **1967**, 38 (1), 22-27.
67. Knudson, D.; Johnston, D., Validity and reliability of a bench trunk-curl test of abdominal endurance. *Journal of Strength and Conditioning Research* **1995**, 9 (3), 165-169.
68. Clemons, J. M.; Duncan, C. A.; Blanchard, O. E.; Gatch, W. H.; Hollander, D. B.; Doucet, J. L., Relationships between the flexed-arm hang and select measures of muscular fitness. *Journal of Strength and Conditioning Research* **2004**, 18 (3), 630-636.
69. Wood, H. M.; Baumgartner, T. A., Objectivity, reliability, and validity of the bent-knee push-up for college-age women. *Meas Phys Educ Exerc Sci* **2004**, 8 (4), 203-212.
70. Clemons, J. M.; Campbell, B.; Jeanson, C., Validity and reliability of a new test of upper body power. *Journal of Strength and Conditioning Research* **2010**, 24 (6), 1559-1565.
71. Clemons, J. M., Construct validity of a modification of the flexed arm hang test. *Journal of Strength and Conditioning Research* **2014**, 28 (12), 3523-3530.
72. Cotten, D. J., A comparison of selected trunk flexibility tests. *American Corrective Therapy Journal* **1972**, 26 (1), 24-26.
73. Jackson, A.; Langford, N. J., The criterion-related validity of the sit and reach test: replication and extension of previous findings. *Research Quarterly for Exercise and Sport* **1989**, 60 (4), 384-387.
74. Kippers, V.; Parker, A. W., Toe-touch test: A measure of its validity. *Physical Therapy* **1987**, 67 (11), 1680-1684.
75. Liemohn, W.; Sharpe, G. L.; Wasserman, J. F., Criterion related validity of the sit-and-reach test. *Journal of Strength and Conditioning Research* **1994**, 8 (2), 91-94.
76. Diener, M. H.; Golding, L. A.; Diener, D., Validity and reliability of a one-minute half sit-up test of abdominal strength and endurance. *Research in Sports Medicine* **1995**, 6 (2), 105-119.
77. Mannion, A. F.; Connolly, B.; Wood, K.; Dolan, P., The use of surface EMG power spectral analysis in the evaluation of back muscle function. *Journal of Rehabilitation Research and Development* **1997**, 34 (4), 427-39.
78. Mathiowetz, V., Comparison of Rolyan and Jamar dynamometers for measuring grip strength. *Occupational Therapy International* **2002**, 9 (3), 201-209.
79. Baumgartner, T. A.; Gaunt, S. J., Construct related validity for the Baumgartner Modified pull-up test. *Meas Phys Educ Exerc Sci* **2005**, 9 (1), 51-60.
80. López-Miñarro, P.; Vaquero-Cristóbal, R.; Muyor, J. M.; Espejo-Antúnez, L., Criterion-related validity of sit-and-reach test as measure of hamstring extensibility in older women. *Nutricion Hospitalaria* **2015**, 32 (1), 312-7.

81. Silva, P.; Franco, J.; Gusmao, A.; Moura, J.; Teixeira-Salmela, L.; Faria, C., Trunk strength is associated with sit-to-stand performance in both stroke and healthy subjects. *European Journal of Physical and Rehabilitation Medicine* **2015**, *51* (6), 717-724.
82. Broer, M. R.; Galles, N. R. G., Importance of relationship between various body measurements in performance of the toe-touch test. *Research Quarterly* **1958**, *29* (3), 253-263.
83. Hall, G. L.; Hetzler, R. K.; Perrin, D.; Weltman, A., Relationship of timed sit-up tests to isokinetic abdominal strength. *Research Quarterly for Exercise and Sport* **1992**, *63* (1), 80-84.
84. Härkönen, R.; Harju, R.; Alaranta, H., Accuracy of the Jamar dynamometer. *Journal of Hand Therapy* **1993**, *6* (4), 259-262.
85. Sparto, P. J.; Parnianpour, M.; Reinsel, T. E.; Simon, S., Spectral and temporal responses of trunk extensor electromyography to an isometric endurance test. *Spine* **1997**, *22* (4), 418-25; discussion 425-26.
86. Knudson, D., The validity of recent curl-up tests in young adults. *Journal of Strength and Conditioning Research* **2001**, *15* (1), 81-85.
87. Youdas, J. W.; Krause, D. A.; Hollman, J. H., Validity of hamstring muscle length assessment during the sit-and-reach test using an inclinometer to measure hip joint angle. *Journal of Strength and Conditioning Research* **2008**, *22* (1), 303-309.
88. Bohannon, R. W.; Bubela, D. J.; Magasi, S. R.; Wang, Y.-C.; Gershon, R. C., Sit-to-stand test: Performance and determinants across the age-span. *Isokinetics and Exercise Science* **2010**, *18* (4), 235-240.
89. Ayala, F.; Sainz de Baranda, P.; De Ste Croix, M.; Santonja, F., Reproducibility and concurrent validity of hip joint angle test for estimating hamstring flexibility in recreationally active young me. *Journal of Strength and Conditioning Research* **2012**, *26* (9), 2372-2382.
90. Mier, C. M.; Shapiro, B. S., Sex differences in pelvic and hip flexibility in men and women matched for sit-and-reach score. *Journal of Strength and Conditioning Research* **2013**, *27* (4), 1031-1035.
91. Taylor, J. D.; Fletcher, J. P., Correlation between the 8-repetition maximum test and isokinetic dynamometry in the measurement of muscle strength of the knee extensors: A concurrent validity study. *Physiotherapy Theory and Practice* **2013**, *29* (4), 335-341.
92. Ten Hoor, G. A.; Musch, K.; Meijer, K.; Plasqui, G., Test-retest reproducibility and validity of the back-leg-chest strength measurements. *Isokinetics and Exercise Science* **2016**, *24* (3), 209-216.
93. Clemons, J., Construct Validity of Two Different Methods of Scoring and Performing Push-ups. *Journal of Strength and Conditioning Research* **2019**, *33* (11), 2971-2980.
94. Applegate, M. E.; France, C. R.; Russ, D. W.; Leitkam, S. T.; Thomas, J. S., Sorensen test performance is driven by different physiological and psychological variables in participants with and without recurrent low back pain. *Journal of Electromyography and Kinesiology* **2019**, *44*, 1-7.
95. Mannion, A. F.; Dolan, P., Electromyographic median frequency changes during isometric contraction of the back extensors to fatigue. *Spine* **1994**, *19* (11), 1223-9.

96. Kankaanpää, M.; Laaksonen, D.; Taimela, S.; Kokko, S. M.; Airaksinen, O.; Hänninen, O., Age, sex, and body mass index as determinants of back and hip extensor fatigue in the isometric Sørensen back endurance test. *Archives of Physical Medicine and Rehabilitation* **1998**, 79 (9), 1069-75.
97. Shechtman, O.; Gestewitz, L.; Kimble, C., Reliability and validity of the DynEx dynamometer. *Journal of Hand Therapy* **2005**, 18 (3), 339-347.
98. Coorevits, P.; Danneels, L.; Cambier, D.; Ramon, H.; Vanderstraeten, G., Assessment of the validity of the Biering-Sørensen test for measuring back muscle fatigue based on EMG median frequency characteristics of back and hip muscles. *Journal of Electromyography and Kinesiology* **2008**, 18 (6), 997-1005.
99. Bui, H. T.; Farinas, M.-I.; Fortin, A.-M.; Comtois, A.-S.; Leone, M., Comparison and analysis of three different methods to evaluate vertical jump height. *Clinical Physiology and Functional Imaging* **2015**, 35 (3), 203-209.
100. De Blaiser, C.; De Ridder, R.; Willems, T.; Danneels, L.; Roosen, P., Reliability and validity of trunk flexor and trunk extensor strength measurements using handheld dynamometry in a healthy athletic population. *Physical Therapy in Sport* **2018**, 34, 180-186.
101. Kawano, M. M.; Ambar, G.; Oliveira, B. I. R.; Boer, M. C.; Cardoso, A. P. R. G.; Cardoso, J. R., Influence of the gastrocnemius muscle on the sit-and-reach test assessed by angular kinematic analysis. *Braz J Phys Ther* **2010**, 14 (1), 10-15.
102. España-Romero, V.; Ortega, F. B.; Vicente-Rodríguez, G.; Artero, E. G.; Rey, J. P.; Ruiz, J. R., Elbow position affects handgrip strength in adolescents: validity and reliability of Jamar, DynEx, and TKK dynamometers. *Journal of Strength and Conditioning Research* **2010**, 24 (1), 272-277.
103. Cadenas-Sanchez, C.; Sanchez-Delgado, G.; Martinez-Tellez, B.; Mora-Gonzalez, J.; Löf, M.; España-Romero, V.; Ruiz, J. R.; Ortega, F. B., Reliability and validity of different models of TKK hand dynamometers. *American Journal of Occupational Therapy* **2016**, 70 (4), 7004300010.
104. Kolimechkov, S.; Castro-Piñero, J.; Petrov, A.; Alexandrova, A., The effect of elbow position on the handgrip strength test in children: validity and reliability of TKK 5101 and DynX dynamometers. *Pedagogy Phys Cult Sports* **2020**, 24 (5), 240-247.
105. Miyamoto, K.; Takebayashi, H.; Takimoto, K.; Miyamoto, S.; Inoue, Y.; Takuma, Y.; Okabe, T.; Morioka, S.; Yagi, F., The criterion-related validity of the ten step test compared with motor reaction time. *J Phys Ther Sci* **2008**, 20 (4), 261-265.
106. Miyamoto, K.; Takebayashi, H.; Takimoto, K.; Miyamoto, S.; Morioka, S.; Yagi, F., A new simple performance test focused on agility in elderly people: The Ten Step Test. *Gerontology* **2008**, 54 (6), 365-372.
107. Wells, K. F.; Dillon, E. K., The sit and reach—a test of back and leg flexibility. *Research Quarterly for Exercise and Sport* **1952**, 23 (1), 115-118.

## Supplementary material 1: Search strategy terms

**MEDLINE (via PubMed):** all searches combined

((((((((((((((((Adult[Mesh:NoExp] OR "Middle Aged"[Mesh]) AND ("criterion validity"[All Fields] OR "criterion-related validity"[All Fields] OR validity[All Fields] OR validation[All Fields] OR cross-validation [All Fields]) AND ("Physical fitness"[Mesh]))) OR (((Adult[Mesh:NoExp] OR "Middle Aged"[Mesh]) AND ("criterion validity"[All Fields] OR "criterion-related validity"[All Fields] OR validity[All Fields] OR validation[All Fields] OR cross-validation[All Fields]) AND ("Muscle Strength"[ Mesh] OR "Muscle strength dynamometer"[Mesh]))) OR (((Adult[Mesh:NoExp] OR "Middle Aged"[Mesh]) AND ("criterion validity"[All Fields] OR "criterion-related validity"[All Fields] OR validity [All Fields] OR cross-validation [All Fields]) AND ("Range of motion, articular"[Mesh Major Topic]))) OR (((Adult[Mesh:NoExp] OR "Middle Aged"[Mesh]) AND ("criterion validity" [All Fields] OR "criterion-related validity" [All Fields] OR validity [All Fields] OR validation [All Fields] OR cross-validation [All Fields]) AND ("Postural Balance"[MeSH]))) OR (((Adult[Mesh:NoExp] OR "Middle Aged"[Mesh]) AND ("criterion validity" [All Fields] OR "criterion-related validity" [All Fields] OR validity [All Fields] OR validation [All Fields] OR cross-validation [All Fields]) AND ("Physical Endurance"[ MeSH]))) OR (((Adult[Mesh:NoExp] OR "Middle Aged"[Mesh]) AND ("criterion validity" [All Fields] OR "criterion-related validity" [All Fields] OR validity [All Fields] OR validation [All Fields] OR cross-validation [All Fields]) AND ("Cardiorespiratory fitness"[All Fields] OR "Cardiovascular fitness"[All Fields] OR "Aerobic fitness"[All Fields] OR "Aerobic capacity"[All Fields] OR "Maximal oxygen consumption"[All Fields] OR "VO2max"[All Fields]))) OR (((Adult[Mesh:NoExp] OR "Middle Aged"[Mesh]) AND ("criterion validity" [All Fields] OR "criterion-related



validity" [All Fields] OR validity [All Fields] OR validation [All Fields] OR cross-validation [All Fields]) AND ("Motor fitness"[ All Fields]))) OR (((Adult[Mesh:NoExp] OR "Middle Aged"[Mesh]) AND ("criterion validity" [All Fields] OR "criterion-related validity" [All Fields] OR validity [All Fields] OR validation [All Fields] OR cross-validation [All Fields]) AND ("Running Speed"[All Fields]))) OR (((Adult[Mesh:NoExp] OR "Middle Aged"[Mesh]) AND ("criterion validity" [All Fields] OR "criterion-related validity" [All Fields] OR validity [All Fields] OR validation [All Fields] OR cross-validation [All Fields]) AND (Agility [All Fields]))) OR (((Adult[Mesh:NoExp] OR "Middle Aged"[Mesh]) AND ("criterion validity"[All Fields] OR "criterion-related validity"[All Fields] OR validity[All Fields] OR validation [All Fields] OR cross-validation [All Fields]) AND (EUROFIT[All Fields]))) OR (((Adult[Mesh:NoExp] OR "Middle Aged"[Mesh]) AND ("criterion validity"[All Fields] OR "criterion-related validity"[All Fields] OR validity[All Fields] OR validation[All Fields] OR cross-validation [All Fields]) AND (HRFT-UKK[All Fields]))) OR (((Adult[Mesh:NoExp] OR "Middle Aged"[Mesh]) AND ("criterion validity" [All Fields] OR "criterion-related validity"[All Fields] OR validity[All Fields] OR validation[All Fields] OR cross-validation[All Fields]) AND (ALPHA-FIT[All Fields]))) OR (((Adult[Mesh:NoExp] OR "Middle Aged"[Mesh]) AND ("criterion validity"[All Fields] OR "criterion-related validity"[All Fields] OR validity[All Fields] OR validation[All Fields] OR cross-validation[All Fields]) AND (AFISAL-INEFC[All Fields]))) OR (((Adult[Mesh:NoExp] OR "Middle Aged"[Mesh]) AND ("criterion validity"[All Fields] OR "criterion-related validity"[All Fields] OR validity[All Fields] OR validation[All Fields] OR cross-validation[All Fields]) AND (CAHPER[All Fields]))) OR (((Adult[Mesh:NoExp] OR "Middle Aged"[Mesh]) AND ("criterion validity" [All Fields]

OR "criterion-related validity"[All Fields] OR validity[All Fields] OR validation[All Fields] OR cross-validation[All Fields]) AND (CPAFLA[All Fields]))

*Filters activated:* Publication date from 1990/01/01 to 2020/07/10, Humans, English, Spanish

**Web of Sciences:** all searches combined

(adult\* OR "middle aged") AND ("criterion validity" OR "criterion-related validity" OR validity OR validation OR "cross-validation") AND ("Physical fitness" OR "Physical Conditioning") OR (adult\* OR "middle aged") AND ("criterion validity" OR "criterion-related validity" OR validity OR validation OR "cross-validation") AND ("Muscle strength" OR "Muscular strength" OR dynamometer) OR (adult\* OR "middle aged") AND ("criterion validity" OR "criterion-related validity" OR validity OR validation OR "cross-validation") AND ("Joint Range of Motion" OR "Joint flexibility" OR "Range of motion") AND (Test) OR (adult\* OR "middle aged") AND ("criterion validity" OR "criterion-related validity" OR validity OR validation OR "cross-validation") AND ("Musculoskeletal Equilibrium" OR "Postural Balance" OR "Postural Equilibrium") OR (adult\* OR "middle aged") AND ("criterion validity" OR "criterion-related validity" OR validity OR validation OR "cross-validation") AND ("Cardiorespiratory fitness" OR "Cardiovascular fitness" OR "Aerobic fitness" OR "Aerobic fitness" OR "Aerobic capacity" OR "Maximal oxygen consumption" OR "VO2max" OR "Physical Endurance") OR (adult\* OR "middle aged") AND ("criterion validity" OR "criterion-related validity" OR validity OR validation OR "cross-validation") AND ("Running Speed" OR "Agility" OR "Motor fitness") OR (adult\* OR "middle aged") AND ("criterion validity" OR "criterion-related validity" OR validity OR validation OR "cross-validation") AND (EUROFIT) OR (adult\* OR "middle aged") AND ("criterion validity"

OR "criterion-related validity" OR validity OR validation OR "cross-validation") AND (HRFT-UKK) OR (adult\* OR "middle aged") AND ("criterion validity" OR "criterion-related validity" OR validity OR validation OR "cross-validation") AND (ALPHA-FIT) OR (adult\* OR "middle aged") AND ("criterion validity" OR "criterion-related validity" OR validity OR validation OR "cross-validation") AND (AFISAL-INEFC) OR (adult\* OR "middle aged") AND ("criterion validity" OR "criterion-related validity" OR validity OR validation OR "cross-validation") AND (CAHPER) OR (adult\* OR "middle aged") AND ("criterion validity" OR "criterion-related validity" OR validity OR validation OR "cross-validation") AND (CPAFLA)

## Terms used in the search strategy in MEDLINE (via Pubmed)

| Search<br>criteria 1               | MeSH                                                     |                                                                                                                                   |                                                         |
|------------------------------------|----------------------------------------------------------|-----------------------------------------------------------------------------------------------------------------------------------|---------------------------------------------------------|
|                                    | Search criteria 2                                        | Entry Terms for<br>Criteria 2                                                                                                     | Search criteria 3                                       |
| ("Adult"[MeSH:NoExp]<br>OR "Middle | Physical fitness<br>(MeSH)                               | Fitness, Physical                                                                                                                 |                                                         |
|                                    | Muscle Strength<br>(MeSH)                                | Strength, Muscle                                                                                                                  |                                                         |
|                                    | Muscle strength<br>dynamometer<br>(MeSH)                 | Dynamometer, Muscle<br>Strength<br>Dynamometers, Muscle<br>Strength<br>Muscle<br>Strength Dynamometers                            |                                                         |
|                                    | Range of motion,<br>articular<br>Major Topic*)<br>(MeSH) | Joint Range of Motion<br>Joint Flexibility<br>Flexibility, Joint<br>Range of Motion<br>Passive Range of Motion                    |                                                         |
|                                    | Postural Balance<br>(MeSH)                               | Musculoskeletal Equilibrium<br>Equilibrium, Musculoskeletal<br>Postural Equilibrium<br>Equilibrium, Postural<br>Balance, Postural |                                                         |
|                                    |                                                          |                                                                                                                                   | ("validity" OR "criterion-related validity" OR validity |
|                                    |                                                          |                                                                                                                                   |                                                         |
|                                    |                                                          |                                                                                                                                   |                                                         |
|                                    |                                                          |                                                                                                                                   |                                                         |
|                                    |                                                          |                                                                                                                                   |                                                         |

Aged"[Mes  
h])

|                            |                                                                    |                                         |
|----------------------------|--------------------------------------------------------------------|-----------------------------------------|
| Cardiorespiratory fitness  | -                                                                  | OR validation OR<br>"cross-validation") |
| Cardiovascular fitness     | -                                                                  |                                         |
| Aerobic fitness            | -                                                                  |                                         |
| Aerobic capacity           | -                                                                  |                                         |
| Maximal oxygen consumption | -                                                                  |                                         |
| VO <sub>2</sub> max        | -                                                                  |                                         |
| Running Speed              | -                                                                  |                                         |
| Agility                    | -                                                                  |                                         |
| Physical Endurance         | Endurance, Physical<br>Endurances, Physical<br>Physical Endurances |                                         |
| Motor fitness              | -                                                                  |                                         |
| EUROFIT                    | -                                                                  |                                         |
| HRFT-UKK                   | -                                                                  |                                         |
| ALPHA-FIT                  | -                                                                  |                                         |
| AFISAL-INEFC               | -                                                                  |                                         |
| CAHPER                     | -                                                                  |                                         |
| CPAFLA                     | -                                                                  |                                         |

## **Supplementary material 2: Results of low and very low quality studies**

### **Criterion-related validity**

#### **Cardiorespiratory fitness**

##### *Distance and time-based run/walk tests*

One very low quality study suggested that the University Montreal test [6] was valid for estimating  $\text{VO}_{2\text{max}}$  ( $r=0.96$ ,  $P<.05$ ) (see supplementary table S3). Low quality studies reported that the 400-m [15] ( $\rho = -0.56$ ,  $P<.001$ ) and 6-minute walk [17] tests ( $r=0.85$ ,  $P<.05$ ) had high validity; the 1500-m fast walk test [18] had moderate validity ( $r=0.52$ ,  $P<.01$ ); and the 2.4-km run [10], 1-mile walk [10] and 4-minute run [11] tests had low validity ( $r=0.42$ ,  $P=0.13$ ;  $r=0.18$ ,  $P=0.52$ ; mean difference= $1.6\pm 3.6$  ml/kg/min,  $P<.05$ , respectively) to assess  $\text{VO}_{2\text{max}}$ .

##### *20-m shuttle run test*

One low quality study [13] investigated the criterion-related validity of the 20-m shuttle run test, reporting that this test was valid to assess cardiorespiratory fitness ( $r=0.90$ ,  $P<.001$ ) (see supplementary table S3).

##### *Step tests*

Three low quality studies revealed that the 6-minute step [12, 19] and 3-minute single step [8] tests, were valid ( $r=0.72-0.92$ , both  $P<.05$ ) (see supplementary table S3). However, 2-level step [9], the USO step [7], modified Harvard step [16], and Danish step [21] tests reported low validity ( $r=0.47-0.66$ , all  $P<.01$ ).

#### **Muscular strength**

##### *Maximal isometric strength*

Two and 1 low quality studies observed that the Jamar [78, 84] and Rolyan [78] dynamometer, respectively, were valid ( $r = 0.99$ , both  $P<.05$ ). Moreover, one very low

quality study concluded that the modified flex-hang arm test [71] was valid to assess upper body relative isometric strength ( $r=0.88$ ,  $p<0.001$ ).

### *Endurance strength*

Thirteen low quality studies examined the criterion-related validity of endurance strength (see supplementary table S3). The Baumgartner modified pull-up test [79] turned out to be valid to assess upper body endurance strength ( $r=0.60-0.85$ ,  $P<0.05$ ), while the back-leg-chest test [92] had moderate-high validity ( $r=0.56-0.81$ , all  $P<0.01$ ). The standard push-up test [93] had moderate validity to assess relative upper body endurance strength ( $r=0.7$ ,  $P<0.001$ ) but not the hand-release push-up test [93] ( $r=0.39$ ,  $P<0.05$ ). Three studies reported that the curl-up test or its modifications [76, 83, 86] were not valid to assess trunk endurance strength ( $r=0.32-0.68$ ,  $P<0.05$ ). While 3 studies [77, 85, 94] showed that the Biering-Sørensen test had moderate ( $r=0.75$ ,  $P<0.001$ ) to high ( $r=0.92-0.94$ ,  $P<0.05$ ) validity to assess trunk endurance strength. Four studies [81, 88, 91] found inconclusive results when analysing the validity of the sit-to-stand test different versions to assess lower body endurance strength.

Two very low quality studies observed that the flexed-arm hang, [68] and bent-knee push-up and revised push-up [69] tests had acceptable validity to assess upper body endurance strength ( $r=0.67-0.72$ ,  $P<0.05$ ); and 4 very low quality studies concluded that different versions of the curl-up test [62, 64, 66, 67] were not valid to assess trunk endurance strength ( $r=0.04-0.51$ ,  $P<0.05$ ).

### *Explosive strength*

One very low quality study reported that the medicine ball put test [70] is valid to assess upper body explosive strength in female and male ( $r=0.86$  and  $0.79$ , respectively, both  $P<0.01$ ).

### **Flexibility**

Six low quality studies determined that the sit-and-reach test [72, 73, 75, 80, 87, 90] and its different versions [72, 75] had low-moderate validity to assess low back and hamstring flexibility ( $r=0.12-0.82$ ,  $P<.05$ ). However, the toe-touch test [74, 82] showed high validity to assess hamstring flexibility ( $r=0.81-0.85$ , both  $P<.05$ ). One low quality studies reported that the horizontal and vertical hip joint angle tests [89] had moderate validity ( $r=0.79$ ,  $P<.01$ ).

Two studies classified as very low quality observed that the sit-and-reach [107] ( $r=0.90$ ,  $P<.05$ ) and the adapted Kraus-Weber [65] tests ( $r=0.74-0.82$ ,  $P<.05$ ) were valid to assess hip and hamstring and low back flexibility, respectively.

### **Motor fitness**

Two low quality studies found that the ten step test [105, 106] had moderate validity to estimate agility ( $r=0.35-0.68$ ,  $P<.01$ ). Another low quality study concluded that the Romberg test [9] was not valid to assess the balance ( $r= -0.18-0.23$ ,  $P>.05$ ).

## **REFERENCES**

1. Leger, L.; Boucher, R., An indirect continuous running multistage field test: the Universite de Montreal track test. *Can. J. Appl. Sport. Sci* **1980**, *5*, 77-84.
2. Gabriel, K. K. P.; Rankin, R. L.; Lee, C.; Charlton, M. E.; Swan, P. D.; Ainsworth, B. E.; Pettee Gabriel, K. K.; Rankin, R. L.; Lee, C.; Charlton, M. E.; Swan, P. D.; Ainsworth, B. E., Test-retest reliability and validity of the 400-meter walk test in healthy, middle-aged women. *J Phys Act Health* **2010**, *7* (5), 649-657.
3. Burr, J. F.; Bredin, S. S.; Faktor, M. D.; Warburton, D. E., The 6-minute walk test as a predictor of objectively measured aerobic fitness in healthy working-aged adults. *Physician and Sportsmedicine* **2011**, *39* (2), 133-9.
4. Mikawa, K.; Senjyu, H., Development of a field test for evaluating aerobic fitness in middle-aged adults: Validity of a 15-m Incremental Shuttle Walk and Run Test. *Journal of Sports Science & Medicine* **2011**, *10* (4), 712-717.
5. Azmi, S. H.; Sulaiman, N., Validity of selected cardiovascular field-based test among Malaysian healthy female adult. *J Fundam Appl Sci* **2017**, *9*, 1227-1235.
6. McGawley, K., The Reliability and Validity of a Four-Minute Running Time-Trial in Assessing VO<sub>2</sub>max and Performance. *Frontiers in Physiology* **2017**, *8*, 270.
7. Leger, L. A.; Mercier, D.; Gadoury, C.; Lambert, J., The multistage 20 metre shuttle run test for aerobic fitness. *JOURNAL OF SPORTS SCIENCES* **1988**, *6* (2), 93-101.



8. Giacomantonio, N.; Morrison, P.; Rasmussen, R.; MacKay-Lyons, M. J., Reliability and validity of the 6-minutestep test for clinical assessment of cardiorespiratory fitness in people at risk of cardiovascular disease. *Journal of Strength and Conditioning Research* **2020**, *34* (5), 1376-1382; Arcuri, J. F.; Borghi-Silva, A.; Labadessa, I. G.; Sentanin, A. C.; Candolo, C.; Pires Di Lorenzo, V. A., Validity and reliability of the 6-minute step test in healthy individuals: a cross-sectional study. *Clinical Journal of Sport Medicine* **2016**, *26* (1), 69-75.
9. Siconolfi, S. F.; Garber, C. E.; Lasater, T. M.; Carleton, R. A., A simple, valid step test for estimating maximal oxygen uptake in epidemiologic studies. *American Journal of Epidemiology* **1985**, *121* (3), 382-390.
10. Ritchie, C.; Trost, S. G.; Brown, W.; Armit, C., Reliability and validity of physical fitness field tests for adults aged 55 to 70 years. *Journal of Science and Medicine in Sport* **2005**, *8* (1), 61-70.
11. Santa Maria, D.; Kinnear, G. R.; Kearney, J. T.; Martin, T. P., The objectivity, reliability, and validity of the OSU step test for college males. *Research Quarterly* **1976**, *47* (3), 445-452.
12. Hansen, D.; Jacobs, N.; Bex, S.; D'Haene, G.; Dendale, P.; Claes, N., Are fixed-rate step tests medically safe for assessing physical fitness? *European Journal of Applied Physiology* **2011**, *111* (10), 2593-2599.
13. Lerche, L.; Olsen, A.; Petersen, K. E. N.; Rostgaard-Hansen, A. L.; Dragsted, L. O.; Nordsborg, N. B.; Tjonneland, A.; Halkjaer, J., Validity of physical activity and cardiorespiratory fitness in the Danish cohort "Diet, Cancer and Health-Next Generations". *Scandinavian Journal of Medicine & Science in Sports* **2017**, *27* (12), 1864-1872.
14. Mathiowetz, V., Comparison of Rolyan and Jamar dynamometers for measuring grip strength. *Occupational Therapy International* **2002**, *9* (3), 201-209.
15. Härkönen, R.; Harju, R.; Alaranta, H., Accuracy of the Jamar dynamometer. *Journal of Hand Therapy* **1993**, *6* (4), 259-262.
16. Clemons, J. M., Construct validity of a modification of the flexed arm hang test. *Journal of Strength and Conditioning Research* **2014**, *28* (12), 3523-3530.
17. Baumgartner, T. A.; Gaunt, S. J., Construct related validity for the Baumgartner Modified pull-up test. *Meas Phys Educ Exerc Sci* **2005**, *9* (1), 51-60.
18. Ten Hoor, G. A.; Musch, K.; Meijer, K.; Plasqui, G., Test-retest reproducibility and validity of the back-leg-chest strength measurements. *Isokinetics and Exercise Science* **2016**, *24* (3), 209-216.
19. Clemons, J., Construct Validity of Two Different Methods of Scoring and Performing Push-ups. *Journal of Strength and Conditioning Research* **2019**, *33* (11), 2971-2980.
20. Diener, M. H.; Golding, L. A.; Diener, D., Validity and reliability of a one-minute half sit-up test of abdominal strength and endurance. *Research in Sports Medicine* **1995**, *6* (2), 105-119; Knudson, D., The validity of recent curl-up tests in young adults. *Journal of Strength and Conditioning Research* **2001**, *15* (1), 81-85; Hall, G. L.; Hetzler, R. K.; Perrin, D.; Weltman, A., Relationship of timed sit-up tests to isokinetic abdominal strength. *Research Quarterly for Exercise and Sport* **1992**, *63* (1), 80-84.
21. Mannion, A. F.; Connolly, B.; Wood, K.; Dolan, P., The use of surface EMG power spectral analysis in the evaluation of back muscle function. *Journal of Rehabilitation Research and Development* **1997**, *34* (4), 427-39; Sparto, P. J.; Parnianpour, M.; Reinsel, T. E.; Simon, S., Spectral and temporal responses of trunk extensor electromyography to an isometric endurance test. *Spine* **1997**, *22* (4), 418-25;

- discussion 425-26; Applegate, M. E.; France, C. R.; Russ, D. W.; Leitkam, S. T.; Thomas, J. S., Sorensen test performance is driven by different physiological and psychological variables in participants with and without recurrent low back pain. *Journal of Electromyography and Kinesiology* **2019**, *44*, 1-7.
22. Bohannon, R. W.; Bubela, D. J.; Magasi, S. R.; Wang, Y.-C.; Gershon, R. C., Sit-to-stand test: Performance and determinants across the age-span. *Isokinetics and Exercise Science* **2010**, *18* (4), 235-240; Silva, P.; Franco, J.; Gusmao, A.; Moura, J.; Teixeira-Salmela, L.; Faria, C., Trunk strength is associated with sit-to-stand performance in both stroke and healthy subjects. *European Journal of Physical and Rehabilitation Medicine* **2015**, *51* (6), 717-724; Taylor, J. D.; Fletcher, J. P., Correlation between the 8-repetition maximum test and isokinetic dynamometry in the measurement of muscle strength of the knee extensors: A concurrent validity study. *Physiotherapy Theory and Practice* **2013**, *29* (4), 335-341.
23. Clemons, J. M.; Duncan, C. A.; Blanchard, O. E.; Gatch, W. H.; Hollander, D. B.; Doucet, J. L., Relationships between the flexed-arm hang and select measures of muscular fitness. *Journal of Strength and Conditioning Research* **2004**, *18* (3), 630-636.
24. Wood, H. M.; Baumgartner, T. A., Objectivity, reliability, and validity of the bent-knee push-up for college-age women. *Meas Phys Educ Exerc Sci* **2004**, *8* (4), 203-212.
25. Harvey, V. P.; Scott, G. D., An investigation of the curl-down test as a measure of abdominal strength. *Research Quarterly* **1967**, *38* (1), 22-27; Berger, R., Evaluation of the 2-minute sit-up test as a measure of muscular endurance and strength. *Journal of the Association for Physical and Mental Rehabilitation* **1966**, *20* (4), 140; Knudson, D.; Johnston, D., Validity and reliability of a bench trunk-curl test of abdominal endurance. *Journal of Strength and Conditioning Research* **1995**, *9* (3), 165-169; DeWitt, R., A study of the sit-up Type of test as a means of measuring strength and endurance of the abdominal muscles. *Research Quarterly* **1944**, *15* (1), 60-63.
26. Clemons, J. M.; Campbell, B.; Jeansonne, C., Validity and reliability of a new test of upper body power. *Journal of Strength and Conditioning Research* **2010**, *24* (6), 1559-1565.
27. Jackson, A.; Langford, N. J., The criterion-related validity of the sit and reach test: replication and extension of previous findings. *Research Quarterly for Exercise and Sport* **1989**, *60* (4), 384-387; Youdas, J. W.; Krause, D. A.; Hollman, J. H., Validity of hamstring muscle length assessment during the sit-and-reach test using an inclinometer to measure hip joint angle. *Journal of Strength and Conditioning Research* **2008**, *22* (1), 303-309; Mier, C. M.; Shapiro, B. S., Sex differences in pelvic and hip flexibility in men and women matched for sit-and-reach score. *Journal of Strength and Conditioning Research* **2013**, *27* (4), 1031-1035; López-Miñarro, P.; Vaquero-Cristóbal, R.; Muyor, J. M.; Espejo-Antúnez, L., Criterion-related validity of sit-and-reach test as measure of hamstring extensibility in older women. *Nutricion Hospitalaria* **2015**, *32* (1), 312-7.
28. Liemohn, W.; Sharpe, G. L.; Wasserman, J. F., Criterion related validity of the sit-and-reach test. *Journal of Strength and Conditioning Research* **1994**, *8* (2), 91-94; Cotten, D. J., A comparison of selected trunk flexibility tests. *American Corrective Therapy Journal* **1972**, *26* (1), 24-26.
29. Broer, M. R.; Galles, N. R. G., Importance of relationship between various body measurements in performance of the toe-touch test. *Research Quarterly* **1958**, *29* (3), 253-263; Kippers, V.; Parker, A. W., Toe-touch test: A measure of its validity. *Physical Therapy* **1987**, *67* (11), 1680-1684.

30. Ayala, F.; Sainz de Baranda, P.; De Ste Croix, M.; Santonja, F., Reproducibility and concurrent validity of hip joint angle test for estimating hamstring flexibility in recreationally active young me. *Journal of Strength and Conditioning Research* **2012**, 26 (9), 2372-2382.
31. Wells, K. F.; Dillon, E. K., The sit and reach—a test of back and leg flexibility. *Research Quarterly for Exercise and Sport* **1952**, 23 (1), 115-118.
32. Mathews, D. K.; Shaw, V.; Bohnen, M., Hip flexibility of college women as related to length of body segments. *Research Quarterly* **1957**, 28 (4), 352-356.
33. Miyamoto, K.; Takebayashi, H.; Takimoto, K.; Miyamoto, S.; Inoue, Y.; Takuma, Y.; Okabe, T.; Morioka, S.; Yagi, F., The criterion-related validity of the ten step test compared with motor reaction time. *J Phys Ther Sci* **2008**, 20 (4), 261-265; Miyamoto, K.; Takebayashi, H.; Takimoto, K.; Miyamoto, S.; Morioka, S.; Yagi, F., A new simple performance test focused on agility in elderly people: The Ten Step Test. *Gerontology* **2008**, 54 (6), 365-372.

**Supplementary material 3.** References of high quality studies included in the systematic review.

Mayorga-Vega D, Aguilar-Soto P, Viciano J Criterion-related validity of the 20-m shuttle run test for estimating cardiorespiratory fitness: a meta-analysis. *J Sports Sci Med* 2015;14:536-547.

Mayorga-Vega D, Bocanegra-Parrilla R, Ornelas M *et al.* Criterion-related validity of the distance- and time-based walk/run field tests for estimating cardiorespiratory fitness: a systematic review and Meta-analysis. *PLoS One* 2016;11:e0151671-e0151671.

- Bennett H, Parfitt G, Davison K *et al.* Validity of submaximal step tests to estimate maximal oxygen uptake in healthy adults. *Sports Med* 2016;46:737-750.
- Moher D, Liberati A, Tetzlaff J *et al.* Preferred reporting items for systematic reviews and meta-analyses: the PRISMA statement. *PLoS Med* 2009;6:e1000097.
- Shea BJ, Hamel C, Wells GA *et al.* AMSTAR is a reliable and valid measurement tool to assess the methodological quality of systematic reviews. *J Clin Epidemiol* 2009;62:1013-1020.
- Oja P, Laukkanen R, Pasanen M *et al.* A 2-km walking test for assessing the cardiorespiratory fitness of healthy adults. *Int J Sports Med* 1991;12:356-362.
- Laukkanen R, Oja P, Pasanen M *et al.* Validity of a two kilometre walking test for estimating maximal aerobic power in overweight adults. *Int J Obes Relat Metab Disord* 1992;16:263-268.
- Laukkanen RMT, Oja P, Pasanen ME *et al.* Criterion validity of a two-kilometer walking test for predicting the maximal oxygen uptake of moderately to highly active middle-aged adults. *Scand J Med Sci Sports* 1993: 267-272.
- Laukkanen RMT, Kukkonen-Harjula TK, Oja P *et al.* Prediction of change in maximal aerobic power by the 2-km walk test after walking training in middle-aged adults. *Int J Sports Med* 2000;21:113-116.
- Larsen GE, George JD, Alexander JL *et al.* Prediction of maximum oxygen consumption from walking, jogging, or running. *Res Q Exerc Sport* 2002;73:66-72.
- McNaughton L, Hall P, Cooley D Validation of several methods of estimating maximal oxygen uptake in young men. *Percept Mot Skills* 1998;87:575-584.
- Kline C, Porcari JP, Hintermeister R *et al.* Estimation of from a one-mile track walk, gender, age and body weight. *Med Sports Exerc* 1987;19:253-259.

- George JD, Fellingham GW, Fisher AG A modified version of the Rockport Fitness Walking Test for college men and women. *Res Q Exerc Sport* 1998;69:205-209.
- Lunt H, Roiz De Sa D, Roiz De Sa J *et al.* Validation of one-mile walk equations for the estimation of aerobic fitness in British military personnel under the age of 40 years. *Mil Med* 2013;178:753-759.
- Greenhalgh HA, George JD, Hager RL Cross-validation of a quarter-mile walk test using two VO2 max regression models. *Meas Phys Educ Exerc Sci* 2001;5:139-151.
- Dolgener FA, Hensley LD, Marsh JJ *et al.* Validation of the Rockport Fitness Walking Test in college males and females. *Res Q Exerc Sport* 1994;65:152-158.
- Seneli RM, Ebersole KT, O'Connor KM *et al.* Estimated VO2max from the Rockport Walk Test on a Nonmotorized Curved Treadmill. *J Strength Cond Res* 2013;27:3495-3505.
- George JD, Vehrs PR, Allsen PE *et al.* Development of a submaximal treadmill jogging test for fit college-aged individuals. *Med Sci Sports Exerc* 1993;25:643-647.
- Cao Z-B, Miyatake N, Aoyama T *et al.* Prediction of maximal oxygen uptake from a 3-minute walk based on gender, age, and body composition. *J Phys Act Health* 2013;10:280-287.
- Di Thommazo-Luporini L, Pinheiro Carvalho L, Luporini R *et al.* The six-minute step test as a predictor of cardiorespiratory fitness in obese women. *Eur J Phys Rehabil Med* 2015;51:793-802.
- Di Thommazo-Luporini L, Carvalho LP, Luporini RL *et al.* Are cardiovascular and metabolic responses to field walking tests interchangeable and obesity-dependent? *Disabil Rehabil* 2016;38:1820-1829.
- Manttari A, Suni J, Sievanen H *et al.* Six-minute walk test: a tool for predicting maximal aerobic power (VO2 max) in healthy adults. *Clin Physiol Funct Imaging* 2018.
- Bonet JB, Magalhaes J, Viscor G *et al.* A field tool for the aerobic power evaluation of middle-aged female recreational runners. *Women Health* 2020.

- Cooper SM, Baker JS, Tong RJ *et al.* The repeatability and criterion related validity of the 20 m multistage fitness test as a predictor of maximal oxygen uptake in active young men. *Br J Sports Med* 2005;39:e19.
- Flouris AD, Koutedakis Y, Nevill A *et al.* Enhancing specificity in proxy-design for the assessment of bioenergetics. *J Sci Med Sport* 2004;7:197-204.
- Flouris AD, Metsios GS, Koutedakis Y Enhancing the efficacy of the 20 m multistage shuttle run test. *Br J Sports Med* 2005;39:166-170.
- Metsios GS, Flouris AD, Koutedakis Y *et al.* Criterion-related validity and test-retest reliability of the 20m square shuttle test. *J Sci Med Sport* 2008;11:214-217.
- Kim J, Jung SH, Cho HC Validity and Reliability of Shuttle-Run Test in Korean Adults. *Int J Sports Med* 2011;32:580-585.
- Jurio-Iriarte B, Gorostegi-Anduaga I, Rodrigo Aispuru G *et al.* Association between Modified Shuttle Walk Test and cardiorespiratory fitness in overweight/obese adults with primary hypertension: EXERDIET-HTA study. *J Am Soc Hypertens* 2017;11:186-195.
- Jurio-Iriarte B, Brubaker PH, Gorostegi-Anduaga I *et al.* Validity of the modified shuttle walk test to assess cardiorespiratory fitness after exercise intervention in overweight/obese adults with primary hypertension. *Clin Exp Hypertens* 2018:1-6.
- Lima LP, Leite HR, Matos MA *et al.* Cardiorespiratory fitness assessment and prediction of peak oxygen consumption by Incremental Shuttle Walking Test in healthy women. *PLoS One* 2019;14:e0211327.
- Aadahl M, Zacho M, Linneberg A *et al.* Comparison of the Danish step test and the watt-max test for estimation of maximal oxygen uptake: the Health2008 study. *Eur J Prev Cardiol* 2013;20:1088-1094.

- Kumar SK, Khare P, Jaryal AK *et al.* Validity of heart rate based nomogram for estimation of maximum oxygen uptake in Indian population. *Indian J Physiol Pharmacol* 2012;56:279-283.
- Ricci PA, Cabiddu R, Jürgensen SP *et al.* Validation of the two-minute step test in obese with comorbidities and morbidly obese patients. *Braz J Med Biol Res* 2019;52:e8402.
- Weller IM, Thomas SG, Cox MH *et al.* A study to validate the Canadian Aerobic Fitness Test. *Can J Public Health* 1992;83:120-124.
- Carvalho LP, Di Thommazo-Luporini L, Aubertin-Leheudre M *et al.* Prediction of cardiorespiratory fitness by the six-minute step test and its association with muscle strength and power in sedentary obese and lean young women: a cross-sectional study. *PLoS One* 2015;10:e0145960.
- Teren A, Zachariae S, Beutner F *et al.* Incremental value of veterans specific activity questionnaire and the ymca-step test for the assessment of cardiorespiratory fitness in population-based studies. *Eur J Prev Cardiol* 2016;23:1221-1227.
- Beutner F, Ubrich R, Zachariae S *et al.* Validation of a brief step-test protocol for estimation of peak oxygen uptake. *Eur J Prev Cardiol* 2015;22:503-512.
- Lee O, Lee S, Kang M *et al.* Prediction of maximal oxygen consumption using the Young Men's Christian Association-step test in Korean adults. *Eur J Appl Physiol* 2019;119:1245-1252.
- Hong SH, Yang HI, Kim DI *et al.* Validation of submaximal step tests and the 6-min walk test for predicting maximal oxygen consumption in young and healthy participants. *Int J Environ Res Public Health* 2019;16.
- Kieu NTV, Jung SJ, Shin SW *et al.* The validity of the YMCA 3-minute step test for estimating maximal oxygen uptake in healthy Korean and Vietnamese adults. *J Lifestyle Med* 2020;10:21-29.

- Hansen D, Jacobs N, Thijs H *et al.* Validation of a single-stage fixed-rate step test for the prediction of maximal oxygen uptake in healthy adults. *Clin Physiol Funct Imaging* 2016;36:401-406.
- Espana-Romero V, Artero EG, Santaliestra-Pasias AM *et al.* Hand span influences optimal grip span in boys and girls aged 6 to 12 years. *J Hand Surg [Am]* 2008;33:378-384.
- Cadenas-Sanchez C, Sanchez-Delgado G, Martinez-Tellez B *et al.* Reliability and validity of different models of TKK hand dynamometers. *Am J Occup Ther* 2016;70:7004300010.
- Kolimechkov S, Castro-Piñero J, Petrov A *et al.* The effect of elbow position on the handgrip strength test in children: validity and reliability of TKK 5101 and DynX dynamometers. *Pedagogy Phys Cult Sports* 2020;24:240-247.
- Shechtman O, Gestewitz L, Kimble C Reliability and validity of the DynEx dynamometer. *J Hand Ther* 2005;18:339-347.
- Mannion AF, Dolan P Electromyographic median frequency changes during isometric contraction of the back extensors to fatigue. *Spine (Phila Pa 1976)* 1994;19:1223-1229.
- Coorevits P, Danneels L, Cambier D *et al.* Assessment of the validity of the Biering-Sørensen test for measuring back muscle fatigue based on EMG median frequency characteristics of back and hip muscles. *J Electromyogr Kinesiol* 2008;18:997-1005.
- Kankaanpää M, Laaksonen D, Taimela S *et al.* Age, sex, and body mass index as determinants of back and hip extensor fatigue in the isometric Sørensen back endurance test. *Arch Phys Med Rehabil* 1998;79:1069-1075.
- De Blaiser C, De Ridder R, Willems T *et al.* Reliability and validity of trunk flexor and trunk extensor strength measurements using handheld dynamometry in a healthy athletic population. *Phys Ther Sport* 2018;34:180-186.
- Bui HT, Farinas M-I, Fortin A-M *et al.* Comparison and analysis of three different methods to evaluate vertical jump height. *Clin Physiol Funct Imaging* 2015;35:203-209.



Kawano MM, Ambar G, Oliveira BIR *et al.* Influence of the gastrocnemius muscle on the sit-and-reach test assessed by angular kinematic analysis. *Braz J Phys Ther* 2010;14:10-15.
